# 1            **Landscape and regulation of m<sup>6</sup>A and m<sup>6</sup>Am methylome** 2            **across human and mouse tissues**

3    Jun'e Liu<sup>1,#</sup>, Kai Li<sup>1,2,3,#</sup>, Jiabin Cai<sup>5,6,#</sup>, Mingchang Zhang<sup>7,#</sup>, Xiaoting Zhang<sup>1</sup>,  
4    Xushen Xiong<sup>1,2,3</sup>, Haowei Meng<sup>1</sup>, Xizhan Xu<sup>8</sup>, Zhibin Huang<sup>7</sup>, Jia Fan<sup>5,6,\*</sup> &  
5    Chengqi Yi<sup>1,2,4,\*</sup>

6    <sup>1</sup>*State Key Laboratory of Protein and Plant Gene Research, School of Life Sciences,*  
7    *Peking University, Beijing 100871, China.*

8    <sup>2</sup>*Academy for Advanced Interdisciplinary Studies, Peking University, Beijing 100871,*  
9    *China*

10   <sup>3</sup>*Peking-Tsinghua Center for Life Sciences, Peking University, Beijing, China.*

11   <sup>4</sup>*Department of Chemical Biology and Synthetic and Functional Biomolecules Center,*  
12   *College of Chemistry and Molecular Engineering, Peking University, Beijing 100871,*  
13   *China.*

14   <sup>5</sup>*Department of Liver Surgery and Transplantation, Liver Cancer Institute, Zhongshan*  
15   *Hospital, Fudan University; Key Laboratory of Carcinogenesis and Cancer Invasion of*  
16   *Ministry of Education, Shanghai, 200032, China*

17   <sup>6</sup>*Human Phenome Institute, Fudan University, Shanghai, 200032, China*

18   <sup>7</sup>*Department of Forensic Medicine, School of Basic Medical Sciences, Fudan University,*  
19   *Shanghai 200032, China*

20   <sup>8</sup>*CAS Key Laboratory for Pathogenic Microbiology and Immunology, Institute of*  
21   *Microbiology, Chinese Academy of Sciences, Beijing 100101, China*

22   <sup>#</sup>*These authors contributed equally to this work.*

23   <sup>\*</sup>*Correspondence: [fan.jia@zs-hospital.sh.cn](mailto:fan.jia@zs-hospital.sh.cn) (J. F.); [chengqi.yi@pku.edu.cn](mailto:chengqi.yi@pku.edu.cn) (C. Y.)*

24

## 1 **SUMMARY**

2  $N^6$ -methyladenosine ( $m^6A$ ), the most abundant internal mRNA modification,  
3 and  $N^6,2'$ -O-dimethyladenosine ( $m^6Am$ ), found at the first-transcribed  
4 nucleotide, are two examples of dynamic and reversible epitranscriptomic  
5 marks. However, the profiles and distribution patterns of  $m^6A$  and  $m^6Am$   
6 across different human and mouse tissues are poorly characterized. Here we  
7 report the  $m^6A$  and  $m^6Am$  methylome through an extensive profiling of 42  
8 human tissues and 16 mouse tissue samples. Globally, the  $m^6A$  and  $m^6Am$   
9 peaks in non-brain tissues demonstrates mild tissue-specificity but are  
10 correlated in general, whereas the  $m^6A$  and  $m^6Am$  methylomes of brain tissues  
11 are clearly resolved from the non-brain tissues. Nevertheless, we identified a  
12 small subset of tissue-specific  $m^6A$  peaks that can readily classify the tissue  
13 types. The number of  $m^6A$  and  $m^6Am$  peaks are partially correlated with the  
14 expression levels of their writers and erasers. In addition, the  $m^6A$ - and  
15  $m^6Am$ -containing regions are enriched for single nucleotide polymorphisms.  
16 Furthermore, cross-species analysis of  $m^6A$  and  $m^6Am$  methylomes revealed  
17 that species, rather than tissue types, is the primary determinant of methylation.  
18 Collectively, our study provides an in-depth resource for dissecting the  
19 landscape and regulation of the  $m^6A$  and  $m^6Am$  epitranscriptomic marks  
20 across mammalian tissues.

21

## 1 INTRODUCTION

2 More than 100 RNA modifications have been characterized so far (Machnicka  
3 et al., 2013).  $N^6$ -methyladenosine ( $m^6A$ ) is the most prevalent  
4 post-transcriptional modification of messenger RNA (mRNA) and long  
5 noncoding RNA (lncRNA) in mammalian cells (Li et al., 2016; Liu and Pan,  
6 2016; Zhao et al., 2017).  $m^6A$  modification is catalyzed by a multi-component  
7 methyltransferase complex that consists at least of METTL3, METTL14,  
8 WTAP, KIAA1429 and RBM15 (Bokar et al., 1994; Bokar et al., 1997; Liu et al.,  
9 2014; Ping et al., 2014; Schwartz et al., 2014; Wang et al., 2014b). As the first  
10 reversible mRNA modification,  $m^6A$  can be “erased” via FTO and ALKBH5 (Jia  
11 et al., 2011; Zheng et al., 2013). In addition,  $m^6A$  can be recognized by  
12 different types of reader proteins: the YTH-family proteins that specifically  
13 recognize the  $m^6A$  modification in RNA, proteins with a common RNA binding  
14 domain and its flanking regions together to bind  $m^6A$ , and proteins that use a  
15 so-called  $m^6A$ -switch mechanism for recognition (Hsu et al., 2017; Roundtree  
16 et al., 2017b; Shi et al., 2017; Wang et al., 2014a; Wang et al., 2015; Zhou and  
17 Pan, 2018). These reader proteins further lead to different biological outcomes  
18 for the  $m^6A$ -marked RNA transcripts.

19 Dynamic and reversible  $m^6A$  has been shown to play critical roles in RNA  
20 metabolism, physiological and pathological processes. For instance,  $m^6A$  is  
21 involved in RNA splicing, export, stability, translation and localization

1 (Roundtree et al., 2017a; Yang et al., 2018). Moreover, m<sup>6</sup>A-dependent mRNA  
2 regulation has now been demonstrated to regulate the process of circadian  
3 rhythm, adipogenesis, spermatogenesis, embryonic stem cell self-renewal and  
4 differentiation (Fu et al., 2014). The aberrant regulation of m<sup>6</sup>A is related to a  
5 variety of cancers including acute myeloid leukemia, breast cancer,  
6 glioblastoma, lung cancer and liver cancer (Hong, 2018; Luo et al., 2018),  
7 which highlight the important regulatory roles of m<sup>6</sup>A.

8 Different from the internal m<sup>6</sup>A, there exists a terminal modification, termed  
9 as N<sup>6</sup>,2'-O-dimethyladenosine (m<sup>6</sup>Am). m<sup>6</sup>Am was originally discovered at the  
10 5' end of mRNA in animal cells and viruses in 1975 (Wei et al., 1975). The  
11 2'-hydroxyl position of the ribose sugar of the first and often second nucleotide  
12 following the N<sup>7</sup>-methylguanosine (m<sup>7</sup>G) mRNA cap can be methylated by  
13 2'-O-methyltransferases (2'-O-MTases), termed CMTr1 and CMTr2 (Belanger  
14 et al., 2010; Werner et al., 2011). If the first nucleotide adjacent to the m<sup>7</sup>G cap  
15 is 2'-O-methyladenosine (Am), it could be further methylated at the N<sup>6</sup>-position  
16 to form m<sup>6</sup>Am (Figure 1A). It was only recently discovered that m<sup>6</sup>Am is also  
17 reversible by FTO (Mauer et al., 2017; Wei et al., 2018). Moreover, we and  
18 others discovered that phosphorylated CTD-interacting factor 1 (PCIF1) is the  
19 cap-specific, terminal N<sup>6</sup>-methylation enzyme for m<sup>6</sup>Am (Akichika et al., 2018;  
20 Sun et al., 2018). While FTO works both on terminal m<sup>6</sup>Am and internal m<sup>6</sup>A,  
21 the m<sup>6</sup>Am writer PCIF1 is specific for the terminal m<sup>6</sup>Am modification and

1 hence will further promote the study of the biological functions of m<sup>6</sup>Am in near  
2 future.

3 Several epigenetic and epitranscriptomic marks have been systematically  
4 profiled at the tissue and cell level. For instance, the methylome of  
5 5-methylcytosine in DNA (5mdC) across diverse cell lines and tissues revealed  
6 that the majority (nearly 80%) of CpG sites are similarly methylated; yet, using  
7 the ~20% differentially methylated regions (DMRs), tissue types and putative  
8 regulatory CpGs can be effectively classified and captured (Schultz et al., 2015;  
9 Ziller et al., 2013). More recently, the dynamic spatial and temporal patterns of  
10 inosine have been demonstrated across many tissues of human and other  
11 mammals (Tan et al., 2017). It is reported that the overall editing levels are  
12 relatively similar across tissues whereas editing levels in non-repetitive coding  
13 regions vary. However, m<sup>6</sup>A and m<sup>6</sup>Am methylome at the human tissue level  
14 remains unexplored so far. Previous m<sup>6</sup>A methylome was primarily obtained  
15 from limited numbers of mammalian cell lines and a few mouse tissues, while  
16 newly discovered reversible m<sup>6</sup>Am methylome was even less well  
17 characterized.

18 In this study, we performed comprehensive analyses of m<sup>6</sup>A and m<sup>6</sup>Am  
19 methylome in 42 human and 16 mouse tissue samples. We first recapitulated  
20 the similar distribution pattern and consensus motif for m<sup>6</sup>A and m<sup>6</sup>Am in  
21 human tissues, as those found in cell lines. We then identified “conserved” and

1 “non-conserved” m<sup>6</sup>A peaks and revealed that m<sup>6</sup>A & m<sup>6</sup>Am peaks are  
2 correlated across various non-brain tissues at the overall level, whereas  
3 methylome of brain tissues show higher tissue-specificity. Interestingly, the  
4 tissue-specific m<sup>6</sup>A peaks could readily distinguish different types of human  
5 and mouse tissue. By analyzing the association between the peak numbers of  
6 m<sup>6</sup>A & m<sup>6</sup>Am and the expression of the known methyltransferases &  
7 demethylases, we uncover that m<sup>6</sup>A and m<sup>6</sup>Am are associated with its writers  
8 and erasers. Moreover, the m<sup>6</sup>A- and m<sup>6</sup>Am-containing regions are enriched  
9 for single nucleotide polymorphisms (SNPs) in all tissues. To gain further  
10 insight into m<sup>6</sup>A and m<sup>6</sup>Am variance, we performed cross-species analysis and  
11 revealed that species are more determinant than tissue types. Collectively, our  
12 study provides in-depth resource toward elucidating the dynamic patterns and  
13 regulation of the epitranscriptomic marks m<sup>6</sup>A and m<sup>6</sup>Am across various  
14 human and mouse tissues.

15

## 16 **RESULTS**

### 17 **m<sup>6</sup>A and m<sup>6</sup>Am abundance across human and mouse tissues**

18 To determine the abundance of m<sup>6</sup>A and m<sup>6</sup>Am in different human and mouse  
19 tissues, post-mortem samples which include 42 tissues from 6 individuals (5  
20 males and 1 female) and 16 tissues from 2 male mice were subjected to  
21 quantitative MS analysis (Figures 1A-1C and S1A –S1E). The quantification of

1 m<sup>6</sup>A follows the standard procedure (Jia et al., 2011), a decapping step was  
2 adapted for m<sup>6</sup>Am owing to its association with the mRNA cap (Mauer et al.,  
3 2017; Wei et al., 2018). Application of the quantitative MS studies to various  
4 human tissues revealed that the m<sup>6</sup>A/A ratio of total RNA is approximately  
5 0.11%~0.23% (Figure S1D), while the m<sup>6</sup>Am/A ratio ranges from 0.0036% to  
6 0.0169% (Figure S1E). Hence, the variation of m<sup>6</sup>Am content across different  
7 tissues seems to be greater than that of m<sup>6</sup>A. Comparatively speaking, the  
8 level of m<sup>6</sup>Am is ~2.2%-11.4% of that of m<sup>6</sup>A in the same tissue. Overall, the  
9 results show that both the m<sup>6</sup>A and m<sup>6</sup>Am are widespread in various human  
10 and mouse tissues.

11

## 12 **Transcriptome-wide m<sup>6</sup>A and m<sup>6</sup>Am profiling in human and mouse** 13 **tissues**

14 To investigate the distribution and dynamics of the m<sup>6</sup>A and m<sup>6</sup>Am among  
15 different tissues, transcriptome-wide m<sup>6</sup>A and m<sup>6</sup>Am mapping was performed.  
16 Due to the limited amount and partial degraded nature of human tissue RNA  
17 samples, we adopted a recently published refined RIP-seq protocol for  
18 low-input materials with several modifications (Zeng et al., 2018). It is worth  
19 mentioning that instead of random priming, a template-switching reaction at 5'  
20 end of RNA template was used during library construction so that the 5' end  
21 sequence information of RNA was preserved. Combining with the existing

1 knowledge of the cap-adjacent position of m<sup>6</sup>A modification, m<sup>6</sup>A sites of  
2 mRNA can hence be more accurately determined. Moreover, we removed the  
3 cDNA originated from rRNA after the reverse transcription instead of  
4 performing a poly(A)<sup>+</sup> selection, thereby allowing the preservation and profiling  
5 of the non-coding RNAs, including long non-coding RNA (lncRNA) and small  
6 nuclear RNA (snRNA) in our study. For instance, U2 and U6 snRNAs are  
7 enriched across all tissue samples in our study (Figures S1F and S1G), which  
8 is consistent with the previous findings that U6 contains a m<sup>6</sup>A43 and U2  
9 contain a m<sup>6</sup>A at position 30 (Bohnsack and Sloan, 2018). Furthermore, the  
10 high correlation between HEK293T samples from different batches of  
11 experiments suggests good reproducibility of our epitranscriptomic sequencing  
12 (Figure S1H).

13 We identified 11,060 -24,259 m<sup>6</sup>A peaks for the different human and mouse  
14 tissues involved in our study, and calculated the distribution pattern of m<sup>6</sup>A in  
15 their mRNAs (Table S1 and S2). Consistent with previous observations, we  
16 found that m<sup>6</sup>A peaks were markedly enriched near the stop codon and the  
17 distribution pattern of m<sup>6</sup>A is similar among all human tissues (Figure 1D).  
18 Moreover, the peak numbers are positively correlated with the m<sup>6</sup>A abundance  
19 detected by MS in human and mouse (Figures 1E and 1F). To assess the  
20 sequence features of m<sup>6</sup>A, we performed motif search of m<sup>6</sup>A-enriched regions.



1 The previously reported consensus “GRACH” motif (where R represents G or  
2 A; H represents A, C, or U) were identified in all tissues (Figure 1G).

3 We also analyzed m<sup>6</sup>Am peaks by distinguishing it from m<sup>6</sup>A peaks,  
4 based on detecting methylated transcriptional start sites as previously  
5 suggested (Schwartz et al., 2014). We observed a positive correlation of m<sup>6</sup>Am  
6 signal with the m<sup>6</sup>Am abundance detected by MS in human and mouse tissues  
7 (Figures 1H and 1I). Moreover, we found that the number of m<sup>6</sup>Am peaks in  
8 mRNA varies greatly in different samples, ranging from 526 to 1,028 peaks  
9 (Table S1). We next analyzed the m<sup>6</sup>Am consensus and found that they are  
10 enriched in the canonical BCA motif (A=m<sup>6</sup>Am, B=C, G or U) (Figure 1J). As  
11 expected, the nucleotides adjacent to the BCA motif are pyrimidine-rich  
12 sequences known to be around TSS (Carninci et al., 2006; Frith et al., 2008; Ni  
13 et al., 2010; Plessy et al., 2010).

14

## 15 **Conservation and tissue-specificity of m<sup>6</sup>A across human and mouse** 16 **tissues**

17 To investigate potential tissue-specificity of the m<sup>6</sup>A methylome, we first  
18 classified all the genes into five categories based on their expression across  
19 42 human tissues as previously published (Uhlen et al., 2015) (see Method  
20 Details). We next assessed the proportion of m<sup>6</sup>A modified genes and peak  
21 intensity among human tissues. Notably, both the percent of modified genes

1 and peak intensity in ubiquitously expressed genes are significantly higher  
2 than that of tissue enriched group for human ( $P < 2.2 \times 10^{-16}$ ) (Figures S2A and  
3 2B). We also ruled out difference in expression levels as the explanation, since  
4 no significant difference was observed for the two categories (Figure S2C).  
5 Take the brain related tissues (cerebellum, cerebrum, hypothalamus and  
6 brainstem) as examples, the intensity of brain enriched genes is significantly  
7 lower than that of brain non-enriched genes (Figure S2D). Collectively, the  
8 results imply that ubiquitously expressed genes are more likely to be m<sup>6</sup>A  
9 regulated, while tissue enriched genes are more prone to be regulated at  
10 transcript levels.

11 To further explore the tissue-specificity of m<sup>6</sup>A without the interference of  
12 gene expression, we compared the m<sup>6</sup>A methylome using the ubiquitously  
13 expressed genes across diverse human and mouse tissues. Overall, four  
14 clusters were readily found in human: group 1 are methylome signals from  
15 brain tissues (cerebellum, cerebrum, hypothalamus and brainstem), group 2  
16 are methylome of rectum and jejunum, group 3 are methylome of other  
17 non-brain tissues used in our study, and group 4 are methylome signals of  
18 HEK293T cells. This observation suggests that the m<sup>6</sup>A methylome of brain  
19 related tissues are highly specific, while the m<sup>6</sup>A methylome of non-brain  
20 tissues show certain tissue-specificity (for instance, rectum and jejunum) but  
21 are grouped together in general (Figure 2A). This finding is further

1 corroborated with the m<sup>6</sup>A methylome of mouse tissues (Figure 2B). Thus, our  
2 observation implies that m<sup>6</sup>A is involved in the regulation of brain-specific  
3 functions that are different from the rest of tissues both in human and mouse.  
4 Note that there is less variation among mouse tissues; hence a relatively  
5 higher tissue-specificity among non-brain tissues is also observed in mouse  
6 (Figure 2B).

7 We then assessed the intensity of the “conserved m<sup>6</sup>A peaks” (peaks  
8 identified in all tissues) and “non-conserved m<sup>6</sup>A peaks”. We found that the  
9 intensity of the conserved m<sup>6</sup>A peaks is significantly higher than that of the  
10 non-conserved m<sup>6</sup>A both in human and mouse ( $P < 2.2 \times 10^{-16}$ ) (Figures 2C and  
11 2D), suggesting important regulatory roles of the conserved m<sup>6</sup>A signal. Take  
12 *PTEN* as an example for the conserved m<sup>6</sup>A peaks: it is stably expressed in all  
13 examined tissues and similarly m<sup>6</sup>A modified. Three m<sup>6</sup>A peak clusters which  
14 are located at 5'-UTR, CDS and around stop codon respectively can be  
15 identified in all tissues, indicating that m<sup>6</sup>A may play a generic regulatory role  
16 for *PTEN* (Figure 2E). Another gene, *SOX2*, was taken as an example for the  
17 non-conserved m<sup>6</sup>A peaks (Figure 2E).

18 Although we did not observe strong tissue-specificity of m<sup>6</sup>A methylome  
19 across different non-brain tissues in human and mouse, we nevertheless  
20 analyzed the tissue-specific m<sup>6</sup>A peaks among the tissues. Within the 9,431  
21 ubiquitously expressed genes, we identified 21,480 m<sup>6</sup>A peaks, out of which

1 1,898 peaks are conserved across tissues while 594 m<sup>6</sup>A peaks are  
2 tissue-specific. Interestingly, all the tissue samples can be readily separated  
3 based on the small group of tissue-specific m<sup>6</sup>A signals for both human and  
4 mouse (Figures 2F and 2G). Moreover, we found that genes encoding  
5 transcripts with brain-specific m<sup>6</sup>A signals are enriched in head development  
6 functions (Figure S2E).

7 Besides mRNA, m<sup>6</sup>A is also found in lncRNA (Bohnsack and Sloan, 2018;  
8 Fu et al., 2014). Specifically, among the 42,873 lncRNAs expressed in the  
9 tissue samples, we totally identified 78,789 m<sup>6</sup>A peaks. In addition, we found  
10 1,816 ubiquitously expressed lncRNAs but the number of conserved m<sup>6</sup>A  
11 peaks is limited (~383). Similar to that of mRNA (Figure 2A), the methylome of  
12 ubiquitously expressed lncRNAs in brain tissues still show high  
13 tissue-specificity (Figure S2F). Moreover, we found that the intensity of the  
14 conserved m<sup>6</sup>A is significantly higher than that of the non-conserved m<sup>6</sup>A in  
15 human lncRNA ( $P < 2.2 \times 10^{-16}$ ) (Figure S2G).

16

### 17 **Tissue-specificity of m<sup>6</sup>Am in human and mouse**

18 We next investigated m<sup>6</sup>Am profiles using hierarchical clustering based on the  
19 correlation among human tissues (the genes should be ubiquitously expressed  
20 in all tissue types). Similar to m<sup>6</sup>A, m<sup>6</sup>Am signals of the brain tissues were  
21 clearly resolved from that of the non-brain tissues (Figure 3A), suggesting that

1 m<sup>6</sup>Am may be involved in the regulation of brain-related physiological  
2 processes. One example of conserved (*ZNHIT6*) and non-conserved  
3 (*AHCYL1*) m<sup>6</sup>Am peak is shown, respectively (Figure 3B). Moreover, we  
4 analyzed the m<sup>6</sup>Am methylome across 16 mouse tissues. Again, the different  
5 brain regions clustered together and are separated from non-brain tissues  
6 (Figure 3C). In fact, the m<sup>6</sup>Am signals of the mouse brain tissues appear to be  
7 further separated away from the rest of the tissues when comparing to the m<sup>6</sup>A  
8 clustering in Figure 2B.

9

#### 10 **m<sup>6</sup>Am negatively correlates with protein level**

11 We next tried to examine potential functions of m<sup>6</sup>Am in mRNA. We found that  
12 the m<sup>6</sup>Am mark is in general negatively correlated with protein level across the  
13 human tissues. For instance, the normalized protein level of m<sup>6</sup>Am marked  
14 genes is significantly lower than that of non-m<sup>6</sup>Am marked genes in multiple  
15 tissues including adrenal gland, cerebrum, heart, prostate, liver, rectum and  
16 testis (Figure 3D). A similar pattern can also be seen in lung, colon and  
17 esophagus, although the difference is not statistically significant owing to the  
18 limited number m<sup>6</sup>Am-marked genes under our strict cutoff for m<sup>6</sup>Am  
19 identification (Figure S3A). Moreover, we divided the m<sup>6</sup>Am marked genes into  
20 three sets on the basis of their modification level. Consistent with our previous

1 finding, the normalized protein level gradually decreases with the enhancement  
2 of the m<sup>6</sup>Am signal (Figure 3E).

3 As the biological function of m<sup>6</sup>A modification relies on its reader proteins, it  
4 would be of great importance to identify potential m<sup>6</sup>Am readers that can  
5 directly regulate RNA metabolism. We adopted a computational pipeline to  
6 screen potential m<sup>6</sup>Am binding proteins using the m<sup>6</sup>Am modification signal  
7 identified in our study and the published crosslinking and immunoprecipitation  
8 followed by high-throughput sequencing (CLIP-seq) of 171 RNA binding  
9 proteins (RBPs) (Huang et al., 2018; Zhu et al., 2019). The top 15 and bottom  
10 15 of the 171 RBPs are shown (Figure S3B). Interestingly, the top candidate,  
11 GNL3, is a known RBP that binds 5'UTR of mRNA; in addition, it does not bind  
12 m<sup>6</sup>A in various systems (Edupuganti et al., 2017). However, because the  
13 current sequencing resolution does not allow us to definitely distinguish m<sup>6</sup>Am  
14 from a nearby m<sup>6</sup>A in the 5'-UTR, future experiments are needed to test the  
15 specificity of the candidates in recognizing m<sup>6</sup>Am.

16

### 17 **Correlation between m<sup>6</sup>A & m<sup>6</sup>Am and the expression of writers &** 18 **erasers**

19 The extent to which variation in m<sup>6</sup>A and m<sup>6</sup>Am modification may be attributed  
20 to the expression of each methyltransferase component and demethylase  
21 remains unknown. By analyzing the peak numbers of m<sup>6</sup>A and m<sup>6</sup>Am in

1 different tissues and the expression of the corresponding proteins, we found  
2 that the expression of methyltransferase components including *METTL3* and  
3 *WTAP* are positively correlated to the m<sup>6</sup>A variation and explains about 36.2%  
4 and 42.6%, of the m<sup>6</sup>A variation in human, respectively (Figures 4A and 4B).  
5 *METTL14* shows a weak correlation with m<sup>6</sup>A variation (Figure 4C). With  
6 regards to m<sup>6</sup>A erasers, the expression of *ALKBH5* is negatively correlated  
7 with m<sup>6</sup>A signal and explained approximately 38.2% of the variation in human  
8 (Figure 4D). In mouse, the expression of methyltransferase components  
9 including *METTL3* and *METTL14* are positively correlated to the m<sup>6</sup>A variation  
10 and explains about 50% and 68.1% of the variance while *WTAP* shows no  
11 correlation (Figures 4H-4J). *ALKBH5* is again negatively correlated with m<sup>6</sup>A  
12 signal and explained 88.6% of the m<sup>6</sup>A variance (Figure 4K). Therefore,  
13 despite slight difference, m<sup>6</sup>A methyltransferase components and demethylase  
14 generally contribute to the m<sup>6</sup>A abundance in human and mouse.

15 We also analyzed the extent to which variation of m<sup>6</sup>Am modification could  
16 be attributed to the expression of its writer and eraser. Very recently, the writer  
17 of m<sup>6</sup>Am has been identified by us and other labs independently: both in vivo  
18 and in vitro evidence has demonstrated that PCIF1 is specific for the  
19 cap-related, terminal m<sup>6</sup>Am modification (Akichika et al., 2018; Sun et al.,  
20 2018). The expression of PCIF1 accounts for approximately 32.8% and 66.2%  
21 of the variation in human and mouse, respectively (Figures 4F and 4M). FTO

1 demethylates both m<sup>6</sup>A, m<sup>6</sup>Am and m<sup>1</sup>A, but its relative activity is recently  
2 shown to be dependent on its sub-cellular localization (Wei et al., 2018). While  
3 the localization of FTO in the human tissues was not examined, unexpectedly,  
4 we observed a non-negative correlation between FTO expression and m<sup>6</sup>A &  
5 m<sup>6</sup>Am variation, respectively (Figures 4E, 4G, 4L and 4N). To look into this  
6 non-negative correlation, we used GTEx datasets to perform co-expression  
7 analysis and found that FTO is highly co-expressed with both the m<sup>6</sup>A and  
8 m<sup>6</sup>Am methyltransferase components (Figure 4O). Considering that m<sup>6</sup>A and  
9 m<sup>6</sup>Am are reversible modifications involved in many different biological  
10 processes, such co-expression of methyltransferase components and  
11 demethylases could be beneficial to the dynamic regulation.

12 Notably, the transcripts of m<sup>6</sup>A and m<sup>6</sup>Am writers and erasers also contain  
13 these methylation marks (Figure 4P). For instance, we found conserved m<sup>6</sup>A  
14 peaks in *METTTL3*, *METTTL14*, *WTAP*, *METTTL16*, *FTO* and *ALKBH5* across all  
15 human tissues and conserved m<sup>6</sup>Am peaks in *WTAP* and *ALKBH5*. We also  
16 identified alternative m<sup>6</sup>Am signals in *METTTL3* and alternative m<sup>6</sup>A signals in  
17 *PCIF1*. Thus, the transcripts of the modification machineries for m<sup>6</sup>A and  
18 m<sup>6</sup>Am are also susceptible to epitranscriptomic regulation so that the crosstalk  
19 between m<sup>6</sup>A and m<sup>6</sup>Am is worth further explored.

20



1 **m<sup>6</sup>A and m<sup>6</sup>Am peaks are enriched for SNPs that are associated with**  
2 **diseases in human tissues**

3 About millions of SNPs have been identified across multiple human genomes  
4 and the SNPs within m<sup>6</sup>A or m<sup>6</sup>Am peak regions are defined as m<sup>6</sup>A-related or  
5 m<sup>6</sup>Am-related SNPs. Here, we sought to investigate the relationship between  
6 m<sup>6</sup>A and SNPs across human tissues. Firstly, we sought to identify the relative  
7 distribution of m<sup>6</sup>A and SNPs. We found that m<sup>6</sup>A-containing regions are  
8 enriched for SNPs and the number of SNPs decreases as the distance from  
9 the m<sup>6</sup>A sites increases (Figure 5A). Within the m<sup>6</sup>A peaks (approximately  
10 200-300nt), we observed ~8,193-31,363 SNPs for each tissue, with jejunum  
11 containing the most abundant SNPs. In fact, non-brain tissues are more  
12 enriched for SNPs than brain tissues in the m<sup>6</sup>A peak regions ( $P < 2.2 * e^{-16}$ )  
13 (Figure 5B). To exclude the possibility that the observed enrichment is due to  
14 the position background, we also used the regions surrounding stop codon of  
15 the overall transcripts (position background control) or genome background for  
16 comparison. We found that the number of SNPs in m<sup>6</sup>A regions are still  
17 significantly higher than that of position background control and genome  
18 background ( $P < 2.2 * e^{-16}$ ) (Figure 5B).

19 We next analyzed the m<sup>6</sup>A-related SNPs and found that the number of  
20 synonymous and nonsynonymous SNPs are comparable, which accounts for  
21 48.9% and 49.7% across all tissues, respectively (Figure S4A). In addition,

1 m<sup>6</sup>A-related SNPs are mainly located at exon (>90%), among which 48.4%  
2 and 49.2% fall within the 3'-UTR and CDS, respectively (Figure S4B and S4C).  
3 Interestingly, m<sup>6</sup>A-related SNPs also include mutations that lead to gain of m<sup>6</sup>A  
4 modification (or “m<sup>6</sup>A-gain variants”). Take *PRUNE1* as an example: a  
5 synonymous mutation, C-to-A mutation (rs3738476) in the CDS region  
6 generates a GGACU sequence *de novo*, which enables this site to be m<sup>6</sup>A  
7 modified (Figure 5C). In total, we identified ~0.76% m<sup>6</sup>A-related SNPs to be  
8 within a 16nt window of a putative RRACH consensus motif. We further used  
9 “Disease ontology (DO)” to reveal the relevance of m<sup>6</sup>A-related SNPs in  
10 diseases, and found that the m<sup>6</sup>A-related SNPs are highly correlated with  
11 diseases including colorectal cancer, colorectal carcinoma and coronary artery  
12 diseases (Figure S4D).

13 We next assessed the correlation between m<sup>6</sup>Am and SNPs. After ruling  
14 out potential positional and genomic background ( $P < 2.2 * e^{-16}$ ), we found that  
15 the m<sup>6</sup>Am regions are also enriched for SNPs in human tissues (Figure 5D).  
16 Different from m<sup>6</sup>A, the SNP frequency has no significant difference between  
17 brain tissues and non-brain tissues ( $P=0.063$ ) (Figure 5E). We next analyzed  
18 m<sup>6</sup>Am-related SNPs and found that the number of synonymous and  
19 nonsynonymous SNPs accounts for 45.5% and 53.1% across all tissues,  
20 respectively (Figure S4E). In addition, m<sup>6</sup>Am-related SNPs are mainly located  
21 at exon (>90%), among which 51.6% and 42.5% fall within the 5'-UTR and

1 CDS, respectively (Figures S4F and S4G). We further revealed that  
2 m<sup>6</sup>A-related SNPs appear to be associated with asthma (Figure S4H).  
3 Interestingly, when we analyzed m<sup>6</sup>A related SNPs in brain tissues, we found  
4 that they are specifically enriched for brain-related diseases including  
5 marijuana abuse, mood abuse and glioblastoma (Figure 5F). Together, our  
6 results suggest a connection between epitranscriptomic marks and risk for  
7 diseases.

8

### 9 **m<sup>6</sup>A peaks are enriched at the microRNA target sites**

10 Because m<sup>6</sup>A peaks are enriched near the stop codon and in the 3'-UTR and  
11 microRNA (miRNA) target sites are frequently observed within 3'-UTR, we  
12 next sought to investigate whether m<sup>6</sup>A are associated with miRNA binding  
13 sites. We found that more than 77%-80% m<sup>6</sup>A-containing transcripts have at  
14 least one miRNA binding site. Further analysis revealed that nearly all the m<sup>6</sup>A  
15 peaks (>96%) could pair with miRNAs with relatively strict alignment criteria  
16 across all tissues. Regions surrounding the m<sup>6</sup>A peaks contain ~9,786-14,104  
17 miRNA binding sites, with cerebellum m<sup>6</sup>A regions contain the most miRNA  
18 target sites. In all the tissues, microRNA targeting sites show an enriched  
19 distribution around the m<sup>6</sup>A peaks (Figure S5A). To rule out that the  
20 enrichment of the miRNA targets is due to potential positional effects, we  
21 analyzed the miRNA targets near stop codon and found that the distribution

1 pattern of miRNA near m<sup>6</sup>A is significantly different from the pattern near stop  
2 codon (Figure S5B).

3 Among the m<sup>6</sup>A consensus motif “RRACH”, “GGACH” is the most frequent  
4 in all tissues (Figure S5C). We used relatively strict criteria in which at most 1nt  
5 mismatch was allowed, and found that m<sup>6</sup>A peaks could be targeted by ~ 423  
6 miRNAs. For instance, the strongest, GGACH consensus motif was inversely  
7 complementary to the seed region of many miRNAs. To further explore the  
8 relationship between microRNA and m<sup>6</sup>A-containing genes, we next searched  
9 miRNAs that are indeed expressed in the corresponding tissues. We found  
10 that 78 miRNAs were stably expressed in all tissues, of which, 11 could pair  
11 with m<sup>6</sup>A motif (Figure S5D). We also identified tissue-specific miRNAs across  
12 urinary bladder, brain, liver, lung and testis, and revealed that they are  
13 inversely complementary to the m<sup>6</sup>A motifs as well (Figure S5E). Finally, the  
14 miRNAs specifically expressed in brain tissues are most likely to target m<sup>6</sup>A  
15 peaks: about 27% of brain-specific miRNAs could pair with m<sup>6</sup>A.

16

### 17 **m<sup>6</sup>A and m<sup>6</sup>Am methylome conservation across species**

18 To demonstrate the conservation of m<sup>6</sup>A between human and mouse, we first  
19 compared the m<sup>6</sup>A methylome in human cerebellum with that of mouse  
20 cerebellum. We observed that the m<sup>6</sup>A-containing orthologous genes in the  
21 cerebellum of the two species exhibit a high overlap (Figure 6A), consistent

1 with the comparative analysis of m<sup>6</sup>A methylome using HepG2 cell lines and  
2 mouse liver (Dominissini et al., 2012). However, the degree of conservation of  
3 m<sup>6</sup>A between tissues and species was still unknown. Intriguingly, although the  
4 overlap between matched tissues from different species is already high (Figure  
5 6A), all tissues of same species demonstrate higher similarity of overall m<sup>6</sup>A  
6 signals and tend to group together than the same tissues of different species  
7 (Figure 6B and S6A). Moreover, we divided the orthologous genes into 5'-UTR,  
8 CDS and 3'-UTR segments and again observed the similar clustering of m<sup>6</sup>A  
9 methylome by species (Figures S6B-6D). In addition, we also picked out the  
10 housekeeping genes as reported before (Eisenberg and Levanon, 2013) and  
11 found that the overlap of the m<sup>6</sup>A-containing housekeeping genes in different  
12 tissue of the same species, for instance human cerebellum and heart, is  
13 significantly higher than that of the matched tissue from different species, for  
14 instance human and mouse cerebellum ( $P < 2.2 *e^{-16}$ ) (Figures 6C and 6D),  
15 implying that the m<sup>6</sup>A methylome of housekeeping genes contributed to the  
16 overall clustering pattern.

17 To obtain a comparative view of m<sup>6</sup>Am methylome across human and  
18 mouse tissues, we performed m<sup>6</sup>Am analysis and again, observed that different  
19 tissue samples were largely grouped by species rather than tissue types  
20 (Figures 6E and S6E). Take the human cerebellum, human heart and mouse  
21 cerebellum as examples, the m<sup>6</sup>Am-containing orthologous genes in the

1 human cerebellum and heart shows significantly higher overlap than that  
2 between the human cerebellum and mouse cerebellum ( $P < 2.2 \times 10^{-16}$ ) (Figures  
3 6E and 6G).

4

## 5 **DISCUSSION**

6 Despite their importance in RNA biology, m<sup>6</sup>A and m<sup>6</sup>Am modifications were  
7 not interrogated across diverse human and mouse tissues. In this study, we  
8 measured the level of m<sup>6</sup>A and m<sup>6</sup>Am and provide the first transcriptome-wide  
9 characterization of m<sup>6</sup>A and m<sup>6</sup>Am methylome in human and mouse tissues.  
10 We show that the overall m<sup>6</sup>A and m<sup>6</sup>Am methylome are similar across various  
11 non-brain tissues, whereas brain tissues are highly specific. Interestingly, a  
12 small subset of tissue-specific m<sup>6</sup>A signals nevertheless distinguish different  
13 human and mouse tissue types. We also find that m<sup>6</sup>A and m<sup>6</sup>Am are partially  
14 associated with their writers and erasers. We uncover associations between  
15 m<sup>6</sup>A & m<sup>6</sup>Am and SNPs, and found a negative correlation between m<sup>6</sup>Am and  
16 protein expression. Finally, we show that species is a stronger factor than  
17 tissue type in determining the m<sup>6</sup>A and m<sup>6</sup>Am methylome. Collectively, our  
18 study reveals that m<sup>6</sup>A and m<sup>6</sup>Am are widespread and dynamically regulated  
19 epitranscriptomic marks across human and mouse tissues.

20 Our transcriptome-wide mapping relies on an antibody that binds to both  
21 m<sup>6</sup>A and m<sup>6</sup>Am. The signals of m<sup>6</sup>A and m<sup>6</sup>Am are not directly separated by

1 the sequencing method, but are rather differentiated bioinformatically by using  
2 a variety of criteria as previously reported (Schwartz et al., 2014). Even though  
3 the two modifications reside in different biological context (internal vs terminal;  
4 and different consensus motifs), the bioinformatics pipeline can not definitely  
5 distinguish them. Nevertheless, our quantitative MS analysis relies on the  
6 different molecular weight of m<sup>6</sup>A and m<sup>6</sup>Am, and hence the modification  
7 levels across different human tissues are accurate. Notably, the number of  
8 m<sup>6</sup>A and m<sup>6</sup>Am peaks and the overall methylome we identified agrees well  
9 with the quantitative modification level by MS. While potential knock-out  
10 experiments of modification enzymes could be performed in cell lines to  
11 cleanly separate the two marks, it is currently not possible to remove  
12 methyltransferases in human tissues. Thus, it will be of great interest to have  
13 epitranscriptomic tools in future to directly and definitely distinguish m<sup>6</sup>A from  
14 m<sup>6</sup>Am.

15 Our analyses reveal that m<sup>6</sup>A and m<sup>6</sup>Am are highly correlative across  
16 non-brain tissues at the overall level, while that of brain tissues show high  
17 tissue- specificity. Such finding is reminiscent of previous studies of inosine  
18 and 5mdC (Schultz et al., 2015; Tan et al., 2017; Ziller et al., 2013). The  
19 inosine profiles across different tissues are also highly correlated, with the  
20 exception that brain regions can be resolved from non-brain tissues by  
21 principal component analysis; while for 5mdC, nearly 80% CpG sites are

1 similarly methylated and the differentially methylated regions (DMRs) only  
2 accounts for 20% CpG sites in diverse cell lines (Schultz et al., 2015; Ziller et  
3 al., 2013). Nevertheless, we still uncovered many transcripts that exhibit  
4 tissue-specific m<sup>6</sup>A methylation patterns, demonstrating that m<sup>6</sup>A signal can  
5 be used to classify different types of human and mouse tissues, consistent  
6 with the use of DMRs to classify unknown samples and identify representative  
7 signature regions that recapitulate major DNA methylation dynamics. As for  
8 the observed tissue-specificity of m<sup>6</sup>A and m<sup>6</sup>Am in brain tissues, many  
9 studies have reported the importance of m<sup>6</sup>A modification in human brain  
10 development and neurological disorders (Du et al., 2018). We also highlight  
11 the specificity of both m<sup>6</sup>A and m<sup>6</sup>Am in brain tissues and show the  
12 brain-specific m<sup>6</sup>A are enriched in brain-related function, further supporting  
13 that m<sup>6</sup>A could play unique roles for brain tissues. It's worth mentioning that  
14 during the preparation of this manuscript, m<sup>6</sup>A methylome in human fetus  
15 tissues was reported (Xiao et al., 2019). Although different human tissue  
16 samples were used, it appears that m<sup>6</sup>A methylome in brain tissues of fetus is  
17 also highly specific.

18 m<sup>6</sup>Am is recently shown to be a reversible epitranscriptomic mark (Mauer  
19 et al., 2017; Wei et al., 2018). However, the ability of FTO to demethylate both  
20 m<sup>6</sup>A and m<sup>6</sup>Am renders it difficult to functionally separate the two modifications.  
21 More recent identification and characterization of the m<sup>6</sup>Am writer protein



1 PCIF1 by us and others have shown that PCIF1 is specific for the cap-related  
2 m<sup>6</sup>Am but not internal m<sup>6</sup>A, providing an orthogonal system to specifically  
3 dissect the biological roles of m<sup>6</sup>Am (Akichika et al., 2018; Sun et al., 2018). In  
4 this study, we show that the expression of PCIF1 is correlated with m<sup>6</sup>Am. In  
5 addition, we found that m<sup>6</sup>Am is negatively correlated with protein level,  
6 providing insights into the functional roles of m<sup>6</sup>Am. It would also be interesting  
7 to integrate such m<sup>6</sup>Am methylome data to identify potential m<sup>6</sup>Am reader  
8 proteins in the future.

9 Our profiling reveals greater m<sup>6</sup>A and m<sup>6</sup>Am difference between species  
10 than tissue types, which is highly suggestive of stronger cis-directed regulation  
11 of m<sup>6</sup>A and m<sup>6</sup>Am methylome. This is also observed for inosine, for which  
12 tissue samples are also largely grouped by species rather than by tissue type.  
13 Additionally, it is found that inosine sites edited similarly between species have  
14 more conserved flanking sequences than sites edited differentially. Once more  
15 m<sup>6</sup>A and m<sup>6</sup>Am datasets (ideally high resolution methylome) in other species  
16 become available in future, the influence of flanking sequences on m<sup>6</sup>A and  
17 m<sup>6</sup>Am signal can also be investigated. Besides, the regulation of m<sup>6</sup>A and  
18 m<sup>6</sup>Am by species-specific trans-acting factors is also worth exploration. For  
19 instance, a novel trans-regulatory factor AIMP2, which enhances the  
20 degradation of the ADAR proteins, has been identified for inosine (Tan et al.,  
21 2017). Future studies aiming at uncovering additional cis- and trans-regulators

1 of m<sup>6</sup>A and m<sup>6</sup>Am are necessary to determine how precise control of  
2 methylation is achieved in a myriad of biological contexts.

3 In summary, our work reveals the dynamic landscape of m<sup>6</sup>A and m<sup>6</sup>Am  
4 across human tissues and provides a resource for functional studies of m<sup>6</sup>A  
5 and m<sup>6</sup>Am in the future.

6

## 7 **ACKNOWLEDGMENTS**

8 The authors would like to thank Hu Zeng, Bo He and Xiaoxue Zhang for  
9 experiments; Xiaoyu Li and Dongsheng Bai for discussions. We acknowledge  
10 Shanghai Epican Genentech Co. Ltd. for helping the sample collection process.

11 This work was supported by the National Natural Science Foundation of China  
12 (nos. 2182570 and 91740112 to C.Y.; 81602513 to J. C.), the Joint Laboratory  
13 of International Scientific and Technological Cooperation (Beijing Municipal  
14 Science and Technology Commission, Cooperative study of RNA modification  
15 detection technology and early diagnosis of disease).

16

## 17 **AUTHOR CONTRIBUTIONS**

18 J.L. and C.Y. conceived the project, designed the experiments and wrote the  
19 manuscript. J.L. performed all experiments. K.L., J.L. and X.Z. designed and  
20 performed the bioinformatics analysis with the help of X.X., H.M. and C.Y. J.C.,

1 M.Z., Z.H., X.X., and J.F collected human and mouse tissue samples. All  
2 authors commented on and approved the paper.

3

#### 4 **DECLARATION OF INTERESTS**

5 The authors declare no competing financial interests.

6

7

8

9

10

11

12

13

14

15

16

17

18

19

20

21

# 1 Figures

2

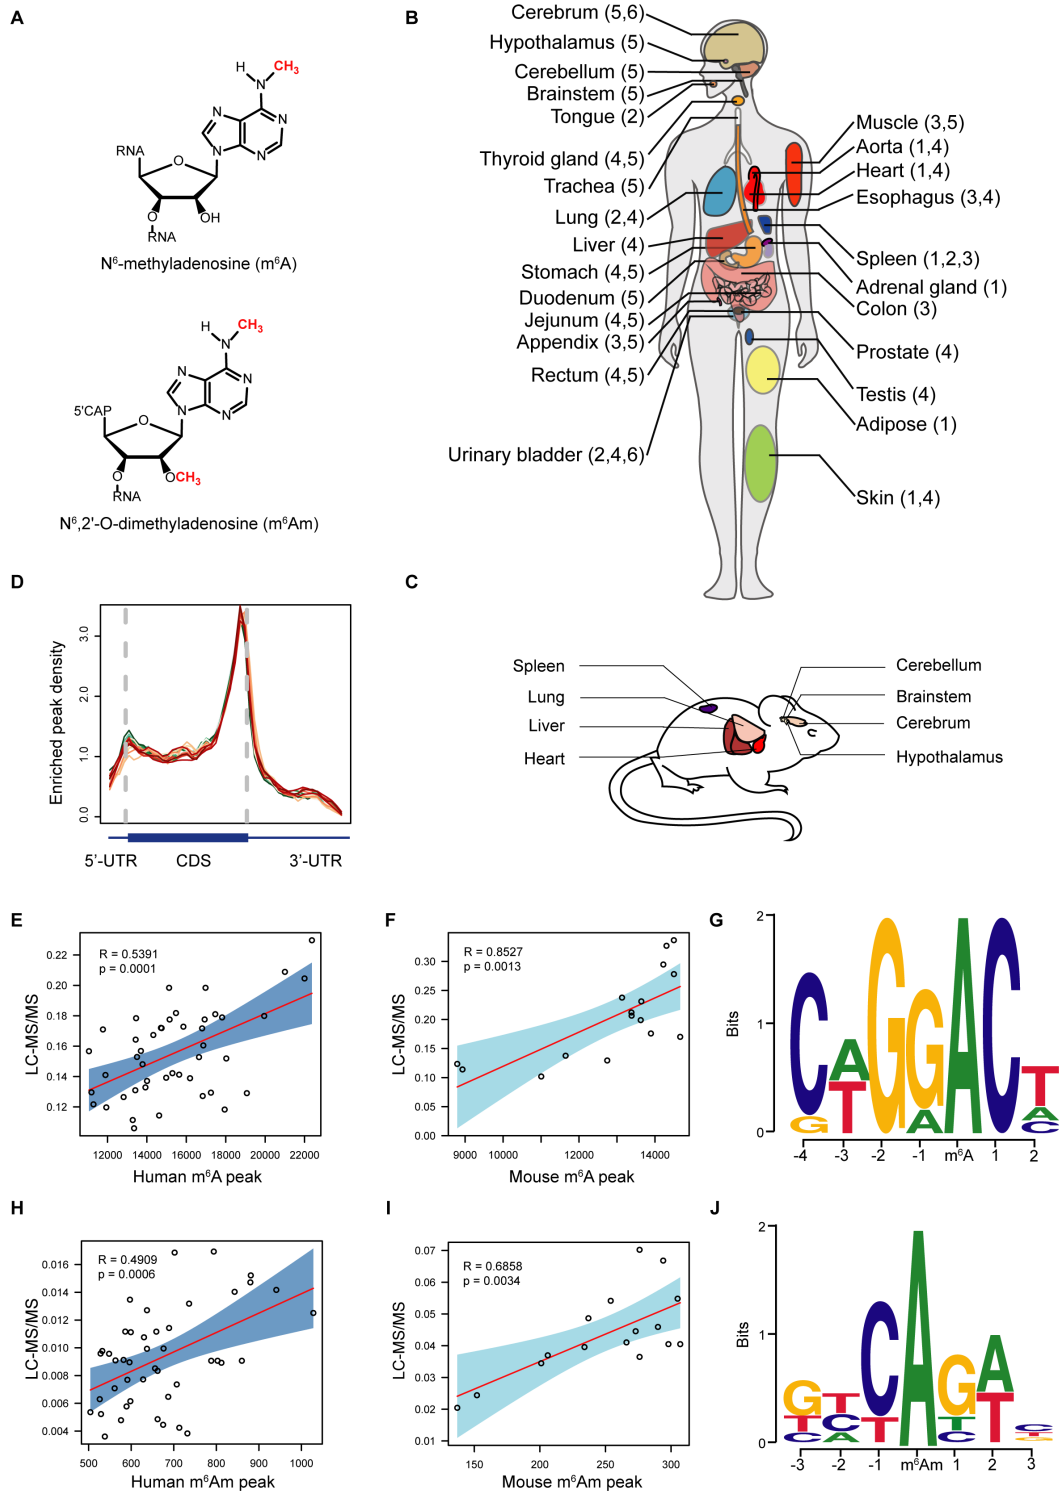

3

4

1 **Figure 1. Overviews of m<sup>6</sup>A and m<sup>6</sup>Am in the collected samples of human and**  
2 **mouse tissues.**

3 (A) Chemical structures of m<sup>6</sup>A and m<sup>6</sup>Am.

4 (B) Human tissues analyzed in this study. Tissues collected from donors are denoted and  
5 values in parentheses represent the donor IDs.

6 (C) Mouse tissues analyzed in this study.

7 (D) Distribution of the enriched m<sup>6</sup>A peaks in all human tissues analyzed along the mRNA  
8 segments. Each segment was normalized according to its average length in Refseq  
9 annotation. Each line denotes the m<sup>6</sup>A distribution in one sample.

10 (E-F) Scatter plots showing the correlations between the m<sup>6</sup>A abundance and the m<sup>6</sup>A  
11 peak numbers across human (E) and mouse tissues (F).

12 (G) Motif analysis revealed a GRACH consensus for m<sup>6</sup>A peaks in human cerebellum  
13 (E-value= 5.5e<sup>-46</sup>). Similar motifs are also observed for m<sup>6</sup>A peaks in other tissue  
14 samples.

15 (H-I) Scatter plots showing the correlations between the m<sup>6</sup>Am abundance and the m<sup>6</sup>Am  
16 peak numbers across human (H) and mouse tissues (I).

17 (J) Motif analysis revealed a BCA consensus for m<sup>6</sup>Am peaks in cerebellum (E-value=  
18 1.6e<sup>-45</sup>). Similar motifs are also observed for m<sup>6</sup>Am peaks in other tissue samples as well.

19

20

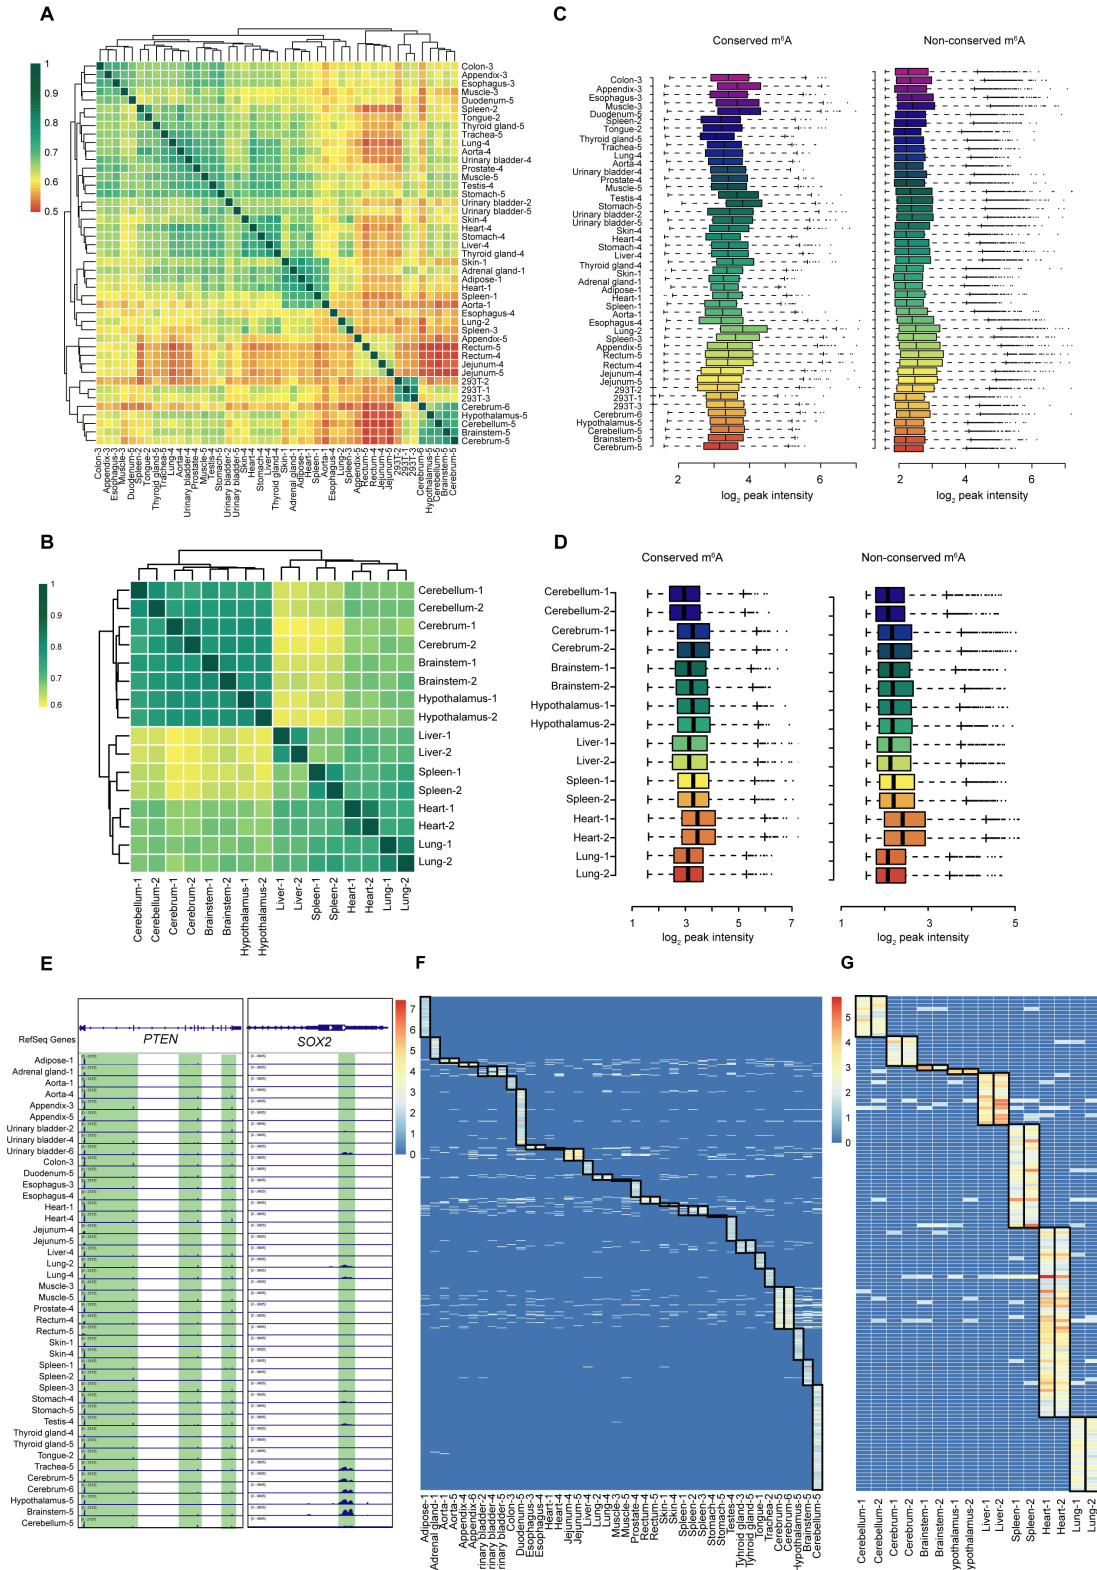

1  
2  
3  
4

1 **Figure 2. m<sup>6</sup>A methylome across different human and mouse tissues.**

2 **(A-B)** Heat map and dendrogram of Spearman correlations of the methylation levels

3 across 42 human tissue samples and three HEK293T cell samples **(A)** and 16 mouse

4 tissues **(B)** calculated using m<sup>6</sup>A intensity. The dendrogram was drawn based on the

5 distance metric computed by the m<sup>6</sup>A intensity. The intensity of the color represents the

6 similarity. Samples are denoted by the tissue name followed by a donor ID and an

7 identical ID indicates that the tissue samples are from the same person or the same

8 mouse.

9 **(C-D)** Intensity of “conserved” and “non-conserved” m<sup>6</sup>A signals across various human

10 tissues and HEK293T cell line **(C)** and mouse tissues **(D)**.

11 **(E)** Representative IGV views of conserved m<sup>6</sup>A peaks (*PTEN*) and non-conserved m<sup>6</sup>A

12 peaks (*SOX2*). Green color denotes m<sup>6</sup>A signal.

13 **(F-G)** m<sup>6</sup>A signals on ubiquitously expressed transcripts in all human tissues **(F)** or mouse

14 tissues **(G)**. The regions marked with boxes denote “tissue-specific” m<sup>6</sup>A signal.

15

16

17

18

19

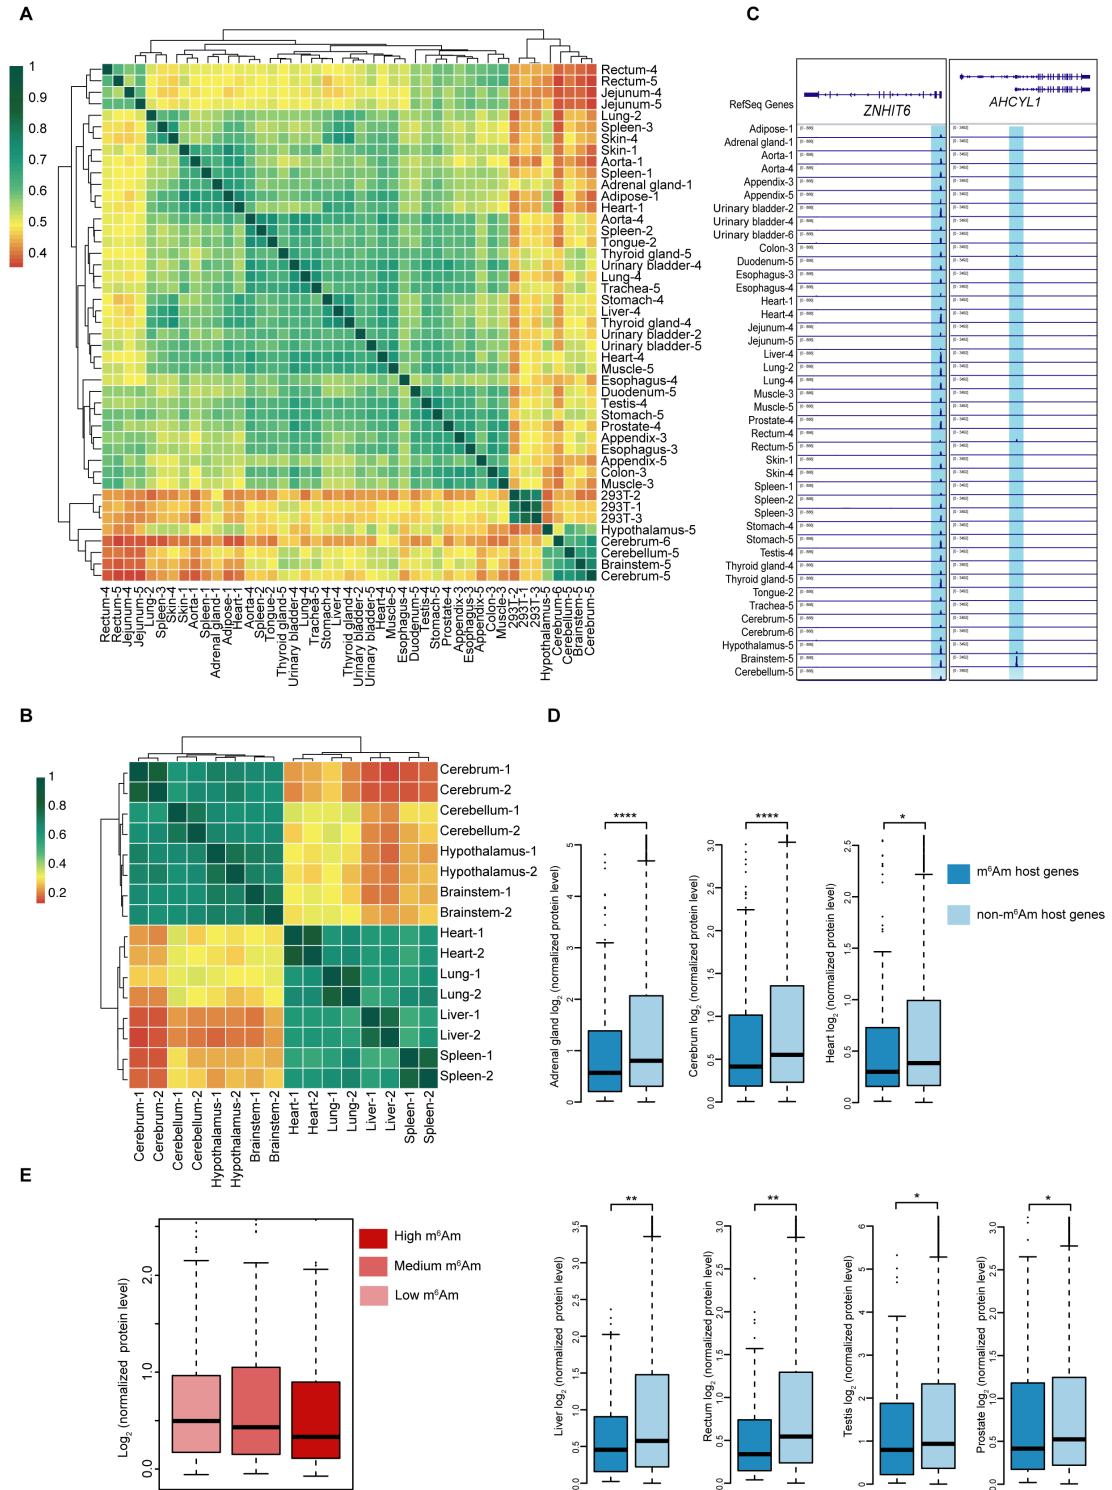

1  
2  
3  
4



1 **Figure 3. m<sup>6</sup>Am methylome across diverse human and mouse tissues.**

2 (A-B) Heat map and dendrogram of Spearman correlations of the m<sup>6</sup>Am levels across  
3 42 human tissue samples and three HEK293T cells (A) and 16 mouse tissues (B). The  
4 dendrogram was drawn based on the distance metric computed by the m<sup>6</sup>Am intensity.  
5 The intensity of the color represents the degree of similarity.

6 (C) Representative IGV views of conserved m<sup>6</sup>Am peaks (*ZNHIT6*) and non-conserved  
7 m<sup>6</sup>Am peaks (*AHCYL1*). Blue color denotes m<sup>6</sup>Am signal.

8 (D) m<sup>6</sup>Am is negatively correlated with protein level in human tissues including adrenal  
9 gland, cerebrum, testis, heart, prostate, liver and rectum. Dark blue indicates the  
10 normalized protein level of m<sup>6</sup>Am-containing genes while the light blue represents the  
11 protein level of non-m<sup>6</sup>Am containing genes. The human proteome data was taken from a  
12 published study (see Method Details). Statistical significance of the difference was  
13 determined by Student's t-test. \*\*\*\*p<0.0001; \*\*\*p < 0.001; \*\*p < 0.01; \*p < 0.05.

14 (E) Boxplot showing that the normalized protein level gradually decreases with the  
15 increase of the m<sup>6</sup>Am signal.

16

17

18

19

20

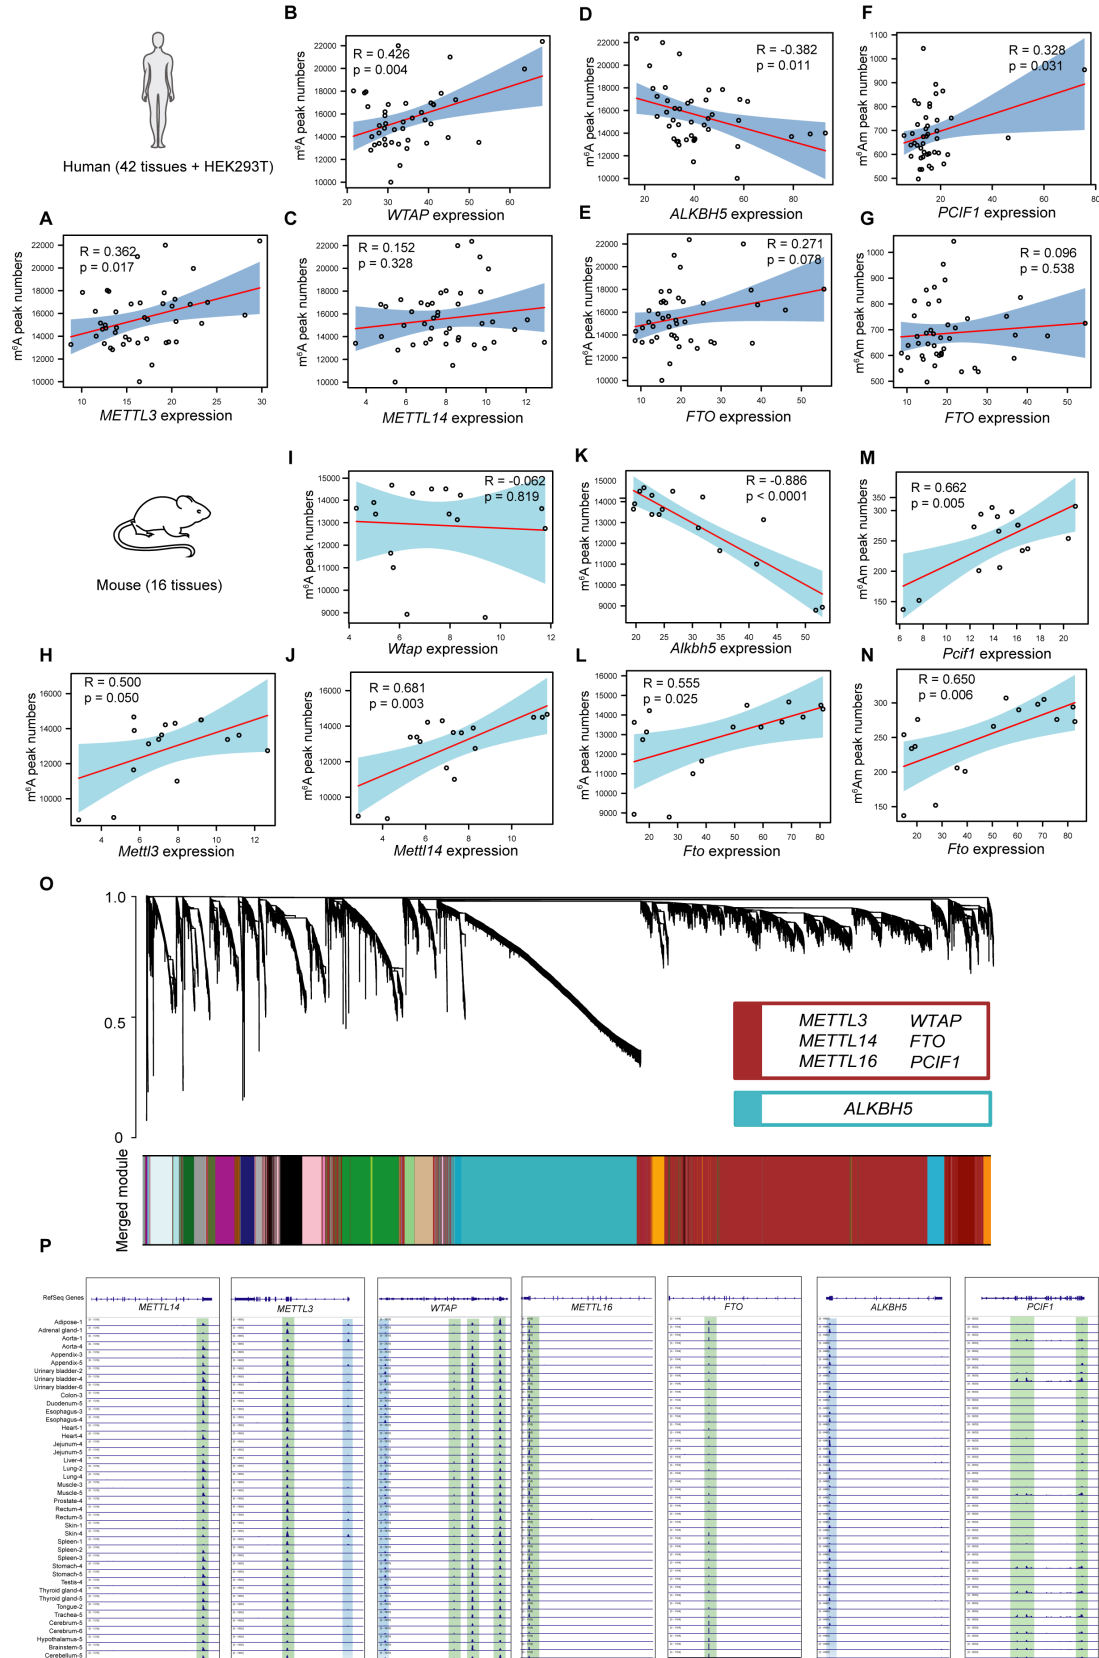

1

2

1 **Figure 4. The correlation between m<sup>6</sup>A/m<sup>6</sup>Am and their corresponding writers &**  
2 **erasers.**

3 **(A-C)** Scatter plots showing the correlations between m<sup>6</sup>A peak numbers and the  
4 expression levels of m<sup>6</sup>A “writer” components including *METTL3* **(A)**, *WTAP* **(B)** and  
5 *METTL14* **(C)** (quantified as the number of RNA-seq reads per kilobase of transcript per  
6 million mapped reads (RPKM)) across human tissues and HEK293T cell.

7 **(D-E)** Correlations between m<sup>6</sup>A peak numbers and the expression levels of m<sup>6</sup>A erasers  
8 including *ALKBH5* **(D)** and *FTO* **(E)** across human tissues and HEK293T cell.

9 **(F-G)** Correlations between m<sup>6</sup>Am peak numbers and the expression levels of *PCIF1***(F)**  
10 and *FTO* **(G)** across human tissues and HEK293T cell.

11 **(H-J)** Scatter plots showing the correlations between m<sup>6</sup>A peak numbers and the  
12 expression levels of *Mettl3* **(H)**, *Wtap* **(I)** and *Mettl14* **(J)** across mouse tissues.

13 **(K-L)** Correlations between m<sup>6</sup>A peak numbers and the expression levels of m<sup>6</sup>A erasers  
14 including *Alkbh5* **(K)** and *Fto* **(L)** across mouse tissues.

15 **(M-N)** Scatter plots showing the correlations between m<sup>6</sup>Am peak numbers and the  
16 expression levels of *Pcif1***(M)** and *Fto* **(N)** across mouse tissues.

17 **(O)** Hierarchical cluster tree showing co-expression mRNA modules identified using  
18 WGCNA. Modules corresponding to mRNAs are labeled by colors.

19 **(P)** IGV views showing the methylation marks on the transcripts of m<sup>6</sup>A & m<sup>6</sup>Am writers  
20 (*METTL3*, *WTAP*, *METTL14*, *METTL16* and *PCIF1*) and erasers (*FTO* and *ALKBH5*).

21 Green box indicates the m<sup>6</sup>A signal; blue box indicates the m<sup>6</sup>Am signal.

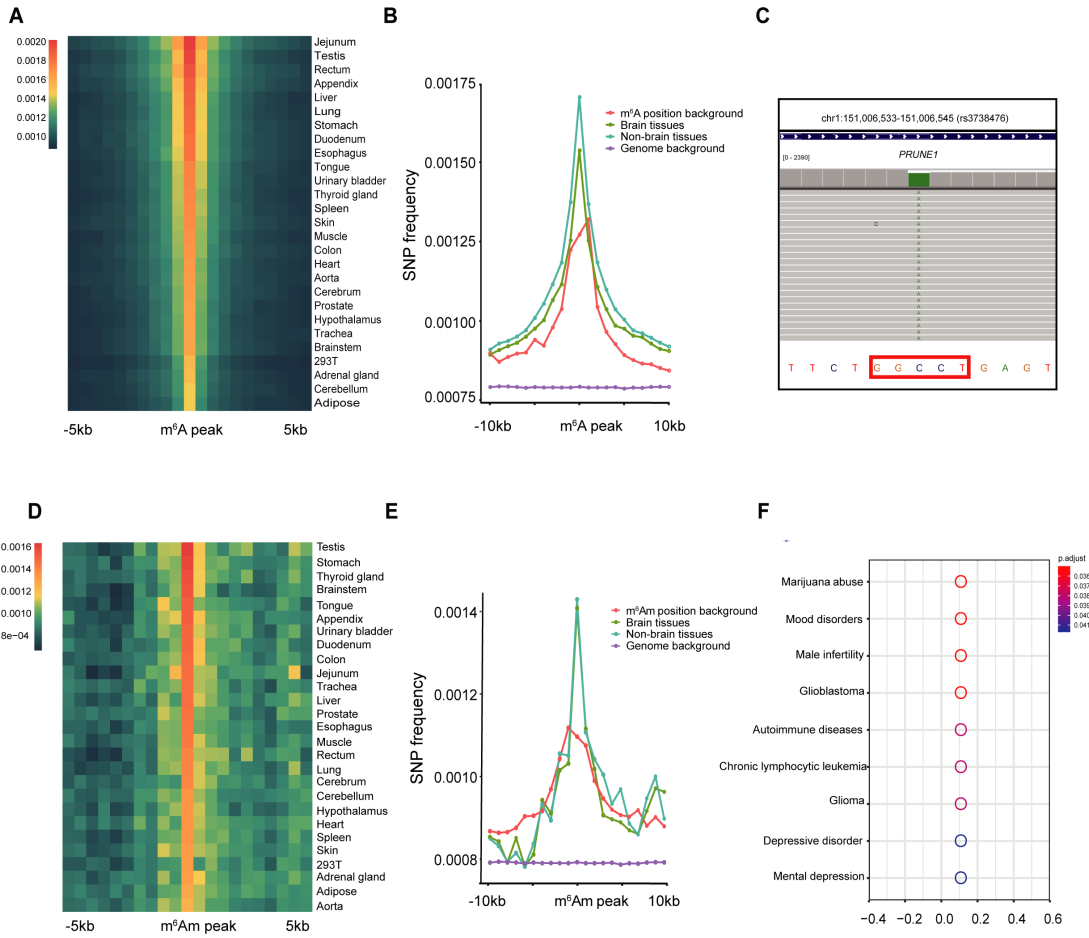

1

2

3

4

5

6

7

8

9

10

11

1 **Figure 5. m<sup>6</sup>A and m<sup>6</sup>Am signals are enriched for SNPs.**

2 (A) Heat map showing the enrichment of SNPs flanking the m<sup>6</sup>A regions across human  
3 tissues.

4 (B) SNP frequency in brain-related tissues (green line) and non-brain tissues (blue line)  
5 flanking the stop codon region ( $P < 2.2 \times 10^{-16}$ ). P-values were calculated using unpaired  
6 two-sided Mann-Whitney U-test. SNP frequency of the position background control  
7 (defined as the regions surrounding stop codon of the overall transcripts; red line), and  
8 genome background (defined as the regions which are selected randomly on the genome;  
9 purple line) are also shown.

10 (C) A representative view of C-to-A mutation in the CDS region of *PRUNE1*, leading to the  
11 *de novo* generation of a GGACU consensus that is further m<sup>6</sup>A methylated in aorta.

12 (D) Heat map showing that the m<sup>6</sup>Am regions are enriched for SNPs across human  
13 tissues.

14 (E) SNP frequency in brain tissues (green line) and non-brain tissues (blue line)  
15 surrounding TSS regions (transcription start site) ( $P < 2.2 \times 10^{-16}$ ). P-values were calculated  
16 using unpaired two-sided Mann-Whitney U-test. SNP frequency of the position  
17 background control (defined as the regions surrounding TSS of the overall transcripts; red  
18 line) and genome background (defined as the regions which are selected randomly on the  
19 genome; purple line) are also shown.

20 (F) Top Disease ontology (DO) categories of the m<sup>6</sup>Am-related SNPs in human brain  
21 tissues including cerebellum, cerebrum, hypothalamus and brainstem.

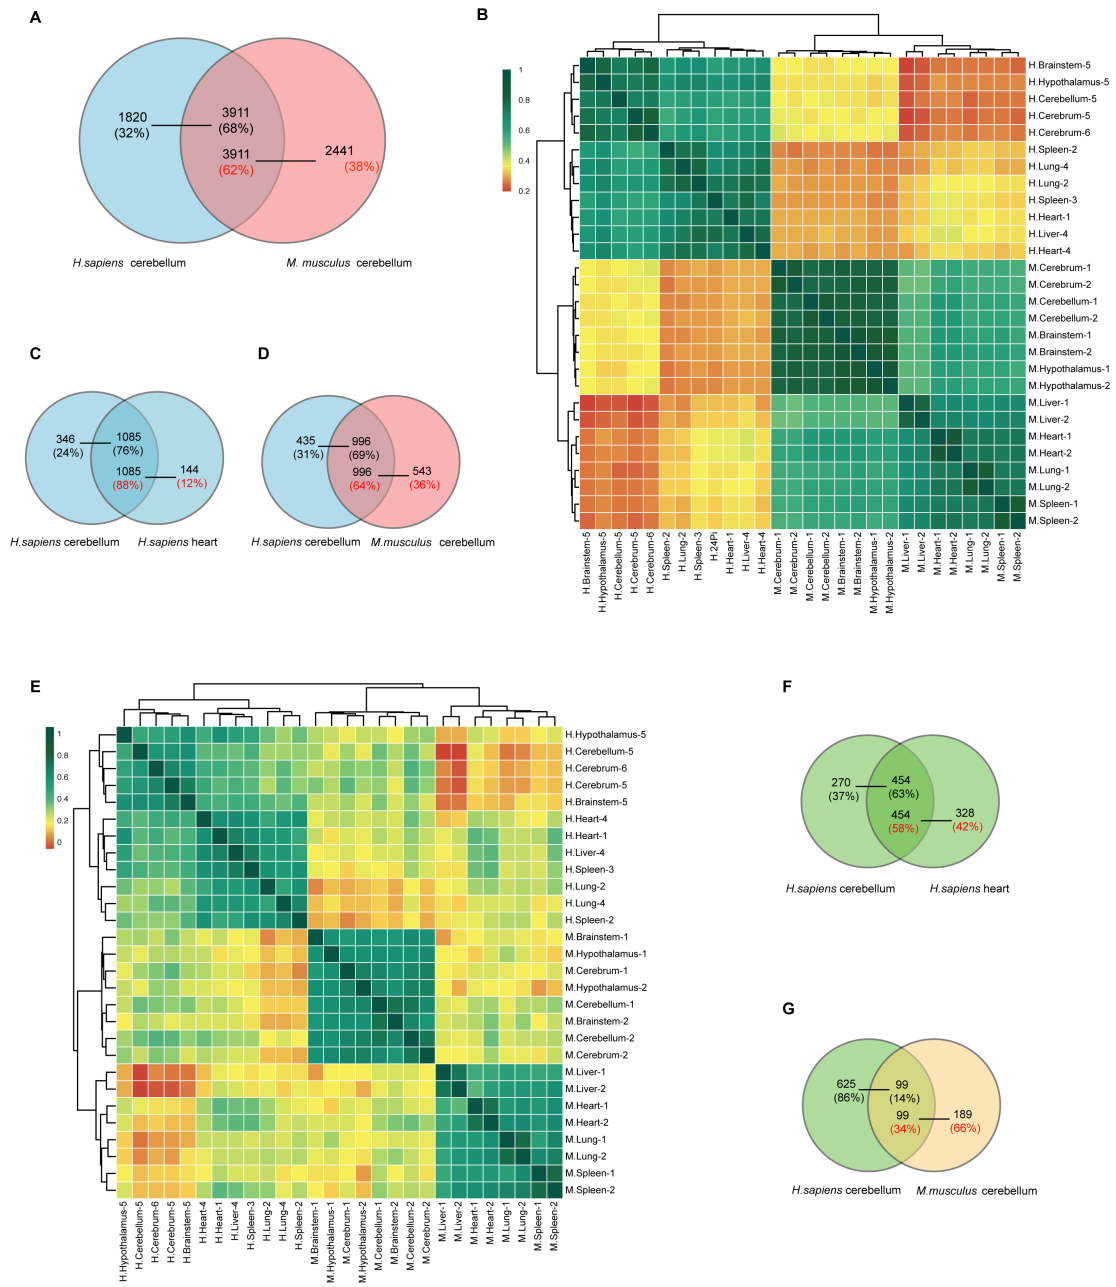

1

2

3

4

5

6

1 **Figure 6. Comparison of m<sup>6</sup>A methylome between human and mouse.**

2 (A) Venn diagram showing the overlap of m<sup>6</sup>A-containing orthologous genes across  
3 human cerebellum and mouse cerebellum.

4 (B) Heat map and dendrogram of Spearman correlations of the m<sup>6</sup>A levels of the matched  
5 tissues between human and mouse.

6 (C-D) Venn diagram showing the overlap of m<sup>6</sup>A-containing housekeeping genes  
7 between human cerebellum and human heart (C), and between human cerebellum and  
8 mouse cerebellum (D).

9 (E) Heat map and dendrogram of Spearman correlations of the m<sup>6</sup>Am levels of the  
10 matched tissues between human and mouse.

11 (F-G) Venn diagram showing the overlap of m<sup>6</sup>Am-containing orthologous genes between  
12 human cerebellum and human heart (F), and between human cerebellum and mouse  
13 cerebellum (G).

14

15

16

17

18

19

20

21

## 1 **STAR METHODS**

### 2 **CONTACT FOR REAGENT AND RESOURCE SHARING**

3 Further information and requests may be directed to, and will be fulfilled by the  
4 corresponding author Chengqi Yi ([chengqi.yi@pku.edu.cn](mailto:chengqi.yi@pku.edu.cn)).

### 6 **EXPERIMENTAL MODEL AND SUBJECT DETAILS**

7 HEK293T was maintained at 37 °C in DMEM medium (Gibco) supplemented  
8 with 10% FBS (Gibco) and 1% penicillin/streptomycin (Gibco).

### 10 **METHOD DETAILS**

#### 11 **Human tissues**

12 42 different somatic tissue samples were collected from six post-mortem  
13 healthy Chinese including 5 female donors and 1 male donor. All samples  
14 were obtained with informed consent under a protocol approved by the ethics  
15 committee of School of Basic Medical Sciences of Fudan University, China.

#### 17 **Mouse tissues**

18 16 mouse tissue samples were collected from 2 male C57BL/6J mice and  
19 used at 7 weeks of age. All mice were bred and kept under specific  
20 pathogen-free conditions in the Laboratory Animal Center of Peking University  
21 in accordance with the National Institute of Health Guide for Care and Use of



1 Laboratory Animals. Animal protocols were approved by the Institutional  
2 Animal Care and Use Committee at Peking University.

3

#### 4 **Cell culture**

5 HEK293T cells was cultured in DMEM medium (Gibco) supplemented with 10%  
6 (v/v) FBS (Gibco) and 1% penicillin/streptomycin (Gibco, 15140) at 37 °C with  
7 5% CO<sub>2</sub>.

8

#### 9 **RNA extraction and DNase treatment**

10 Total RNA was extracted from tissues using TRIzol reagent  
11 (Invitrogen,15596018), followed by DNase I (NEB, M0303L) treatment to  
12 remove DNA contamination. Additional phenol-chloroform isolation and  
13 ethanol precipitation treatment was performed to remove enzyme  
14 contamination.

15

#### 16 **Quantitative analysis of m<sup>6</sup>A and m<sup>6</sup>Am level in different tissues**

17 For the quantification of m<sup>6</sup>A and m<sup>6</sup>Am level in tissues, 150 ng purified RNA  
18 was decapped with 10 U RppH (NEB, M0356S) in ThermoPol buffer for 5  
19 hours at 37 °C. RNA was further digested by 1U nuclease P1 (Sigma, N8630)  
20 in 20 µl buffer containing 10 mM NH<sub>4</sub>Ac, pH 5.3 at 42 °C for 3 h. Subsequently,  
21 1U rSAP (NEB, M0371S) and 5 µl 0.5 M MES buffer, pH 6.5 were added and

1 the mixture was incubated at 37 °C for additional 6 h. The digested RNA was  
2 injected into a LC-MS/MS which includes the ultra-performance liquid  
3 chromatography with a C18 column and the triple-quadrupole mass  
4 spectrometer (AB SCIEX QTRAP 5500). The m<sup>6</sup>A and m<sup>6</sup>Am level were  
5 detected in the positive ion multiple reaction-monitoring (MRM) mode and was  
6 quantified by the nucleoside to base ion mass transitions (282.0-to-150.1 for  
7 m<sup>6</sup>A, 296.0-to-150.1 for m<sup>6</sup>Am, 268.0 -to-136.0 for A). The concentrations of  
8 m<sup>6</sup>A and m<sup>6</sup>Am level in human tissues were calculated from the standard curve  
9 which was generated from pure nucleoside standards.

10

#### 11 **m<sup>6</sup>A-seq with low input RNA across human and mouse tissues**

12 This procedure was performed according to the recently described “Refined  
13 RIP-seq” with several modifications (Zeng et al., 2018). 3 µg total RNA was  
14 fragmented into ~130-nucleotide-long fragments by magnesium RNA  
15 fragmentation buffer (NEB, E6150S). The fragmentation was stopped by  
16 adding RNA fragmentation stop solution followed by ethanol precipitation. 8 ng  
17 of fragmented total RNA was used as input and remained RNA was used to do  
18 the m<sup>6</sup>A-seq. Briefly, RNA was denatured at 65 °C for 5 min, followed by  
19 chilling on ice. 30 µl protein A magnetic beads (Thermo, 10002D) and 30 µl  
20 protein G magnetic beads (Thermo, 10004D) were mixed together and  
21 washed twice using the IPP buffer (10 mM Tris-HCl, pH 7.5, 150 mM NaCl, 0.1%

1 IGEPAL CA-630) and resuspended in 500  $\mu$ l of IPP buffer. The 6  $\mu$ g of affinity  
2 purified anti-m<sup>6</sup>A polyclonal antibody (Millipore, ABE572) was added to the  
3 beads and incubated at 4 °C for about 6 h. After the beads-antibody incubation,  
4 the beads were washed twice by IPP buffer and resuspended with 500  $\mu$ l  
5 mixture which contains 100  $\mu$ l of 5 $\times$ IPP buffer, fragmented total RNA, and 5  $\mu$ l  
6 of RNasin Plus RNase Inhibitor (Promega, N2615) and incubated at 4 °C for  
7 another 2 h. The beads-antibody-RNA mixture was washed with twice IPP  
8 buffer, twice with low-salt IP buffer (10 mM Tris-HCl, pH 7.5, 50 mM NaCl, 0.1%  
9 IGEPAL CA-630), and twice high-salt IP buffer (10 mM Tris-HCl, pH 7.5, 500  
10 mM NaCl, 0.1% IGEPAL CA-630). After extensive washing, bound RNA was  
11 eluted from the beads with 6.7mM N<sup>6</sup>-methyladenosine (Sigma-Aldrich,  
12 M2780) in IPP buffer and additional phenol-chloroform isolation and ethanol  
13 precipitation treatment was performed to purify the RNA. Fragmented total  
14 RNA (Input) and immunoprecipitated RNA (IP) were subjected to library  
15 construction using SMARTer® Stranded Total RNA-Seq Kit v2 - Pico Input  
16 Mammalian (634413, Takara – Clontech, Japan) according to the  
17 manufacturer's protocol. Reverse transcription was performed using random  
18 primers and the ribosome cDNA (cDNA fragments originating from rRNA  
19 molecules) after cDNA synthesis using probes specific to mammalian rRNA.  
20 Libraries for immunoprecipitated RNA were PCR amplified for 14 cycles

1 whereas 11 cycles were used for input RNA. The libraries were sequenced on  
2 Illumina Hiseq X10 with paired-end 2X 150 bp read length.

3

#### 4 **Reads pre-processing and alignment**

5 Raw sequencing reads were firstly subjected to Trim\_galore  
6 ([http://www.bioinformatics.babraham.ac.uk/projects/trim\\_galore/](http://www.bioinformatics.babraham.ac.uk/projects/trim_galore/)) for quality  
7 control and trimming adaptor. The quality threshold was set to 20, and the  
8 minimum length required for reads after trimming was 30 nt. All reads that  
9 mapped to human rRNA by TopHat2 (version 2.0.13)(Kim et al., 2013) were  
10 removed. Processed reads were mapped to genome (hg19, UCSC Genome  
11 Browser and mm10, UCSC Genome Browser) using HISAT2 (version  
12 2.1.0)(Kim et al., 2015) with default parameters, and separated by strand with  
13 in-house scripts.

14

#### 15 **Identification of putative m<sup>6</sup>Am and m<sup>6</sup>A sites**

16 For genome-base peak caller MACS2 (version 2.1.1)(Feng et al., 2012), the  
17 effective genome size was set to  $2.7 \times 10^9$  for human and  $1.87 \times 10^9$  for mouse,  
18 under the option of *-nomodel* and *p-value* cutoff 0.01, and all input bam files  
19 were retained the same reads number. Peak annotated by *annotatePeaks.pl*  
20 (Homer version 4.8)(Heinz et al., 2010), and peaks reads coverage were  
21 showed by IGV (version 2.4.15)(Thorvaldsdottir et al., 2013). An m<sup>6</sup>Am peak

1 was identified when a peak region contains an adenosine at the transcription  
2 start site, following a previously published procedure (Schwartz et al., 2014).  
3 The adenosine transcription start site was defined as: the number of reads  
4 starting at 100 nt before or after the annotated transcription start site (TSS)  
5 was greater than 5 in both IP and input samples, and an adenosine was at the  
6 detected site or at the position immediately preceding it. The m<sup>6</sup>A and m<sup>6</sup>Am  
7 peaks from all tissue samples were all merged to generate the reference peak  
8 list.

9

#### 10 **Peak intensity**

11 The cover of a peak region was defined as its Reads Per Kilobase Million  
12 (RPKM) value, and then the peak intensity for the corresponding region was  
13 calculated as (IP cover) / (Input cover).

14

#### 15 **Tissue-specific m<sup>6</sup>A peaks**

16 Peaks specifically identified in a particular tissue or the intensity of peaks in a  
17 particular tissue at least five times those in all other tissues.

18

#### 19 **Analysis of RNA-seq data**

20 Paired-end, adapter-clean reads were mapped to human and mouse genome  
21 (hg19 and mm10, UCSC Genome Browser) using TopHat2 (version 2.0.13)

1 with default parameters. The expression of transcripts was quantified as FPKM  
2 by Cufflinks (version 2.2.1)(Trapnell et al., 2010). Tissue conserved genes and  
3 tissue specific genes were identified using Summarized Experiment algorithm  
4 in TissueEnrich R package(Jain and Tuteja, 2018). Genes were classified into  
5 five categories based on their expression across 42 human tissues as  
6 previously published (Uhlen et al., 2015) :(I) ubiquitously expressed genes: a  
7 large fraction (59%) of the genes that were detected in all analyzed tissues  
8 (FPKM>1); (II) tissue enhanced genes: genes with only a moderately elevated  
9 expression and mRNA levels in a particular tissue at least five times average  
10 levels in all tissues; (III) group-enriched genes: mRNA levels at least five times  
11 those in a small number of tissues (2-7); (IV) tissue enriched genes: mRNA  
12 levels in one tissue type at least five times the maximum levels of all other  
13 analyzed tissues; (V) mixed genes: detected in fewer than 42 tissues in human  
14 tissues in mouse but not elevated in any tissues.

15

## 16 **Motif discovery and GO enrichment analysis**

17 For the analysis of sequence consensus, the top 1000 peaks were chosen for  
18 de novo motif analysis with MEME (version 4.12.0)(Bailey et al., 2009), with  
19 taken 100 nt long peak summit centred sense sequences as input. Gene  
20 Ontology (GO) enrichment analyses were performed using DAVIED  
21 web-based tool (<http://david.abcc.ncifcrf.gov/>)(Huang et al., 2009).

## 1 **GTEx data download and WGCNA analysis**

2 Genotype-Tissue Expression (GTEx) project data (version 7th) were download  
3 from <https://gtexportal.org/home/>, which contain 500 RNA-seq sample. We  
4 perform weighted gene co-expression network analysis (WGCNA) with GTEx  
5 RNA-seq data. And the count of gene's TPM (Transcripts Per Million) higher  
6 than 0 have to at least larger than 50. Meanwhile miRNA, snoRNA, snRNA  
7 and tRNA were removed from the gene list. For WGCNA in R (version  
8 3.5)(Langfelder and Horvath, 2008) , the soft power was set as 5 and merge  
9 the dynamic module with module distance cutoff was set as 0.3.

10

## 11 **Protein expression analysis**

12 Protein expression data was downloaded from Human Proteome Map (HPM)  
13 database (Kim et al., 2014) and protein expression level was normalized by  
14 gene expression level.

15

## 16 **Relationship analysis of miRNA with m<sup>6</sup>A sites**

17 Human miRNA Expression Database (miRmine) data were download from  
18 <http://guanlab.ccmb.med.umich.edu/mirmine/>, Tissue conserved miRNA and  
19 tissue specific miRNA were identified using Summarized Experiment algorithm.  
20 Human mature miRNA sequences were downloaded from miRbase (Release  
21 22.1)(Kozomara and Griffiths-Jones, 2014). The miRNA seed region (5' 2-8 nt)

1 was obtained and compared with m<sup>6</sup>A peak region using Bowtie (version  
2 1.1.2)(Langmead et al., 2009).

3

#### 4 **Non-coding RNA annotation**

5 The human lncRNA annotation was download from LNCipedia (version  
6 5.2)(Volders et al., 2018), <https://lncipedia.org/download>, while the snoRNA  
7 and snRNA annotation were download from NCBI RefSeq. Finally, all RNA  
8 annotations was merged to build RNA annotation file.

9

#### 10 **Comparison of m<sup>6</sup>A and m<sup>6</sup>Am sites between human and mouse.**

11 To compare human and mouse m<sup>6</sup>A site, Human and mouse orthologous gene  
12 set was downloaded from MGI (<http://www.informatics.jax.org/>), and only  
13 orthologous genes were used to analyze correlations.

14

#### 15 **Correlation analysis of SNPs with m<sup>6</sup>A and m<sup>6</sup>Am signal**

16 To explore the correlation between SNP and m<sup>6</sup>A site, we extended 5 kb  
17 upstream and downstream of each m<sup>6</sup>A peak. Then the total 10 kb region was  
18 divided into 20 windows, with each window spanning 500 bp. The SNP  
19 database, which was obtained from 1000 Genomes Project  
20 ([ftp://gsapubftp-anonymous@ftp.broadinstitute.org/bundle/hg19/1000G\\_omni](ftp://gsapubftp-anonymous@ftp.broadinstitute.org/bundle/hg19/1000G_omni)  
21 2.5.hg19.sites.vcf.gz), intersected with the m<sup>6</sup>A site peaks and the extended



1 windows (bedtools v2.27.1) to count the SNP frequency (Quinlan and Hall,  
2 2010). We next calculated the SNP frequency of transcripts that contain  
3 m<sup>6</sup>A-related SNPs and of the position background which are defined as  
4 regions flanking stop codon (~400bp) to eliminate the influence of position  
5 background. Besides, we also selected 1,000,000 genome random regions  
6 from hg19 (random seed 6135). The SNP frequency of genome random  
7 regions are defined as genome background. The location of m<sup>6</sup>A-related SNP  
8 sites were annotated by the transcript segments, including the CDS, 3' UTR, 5'  
9 UTR, start codon, stop codon and etc., and the type of SNPs were annotated  
10 into synonymous and nonsynonymous by ANNOVAR (Wang et al., 2010). We  
11 used samtools(v1.7)(Li, 2011) to identify SNPs and m<sup>6</sup>A-related SNPs (Jiang  
12 et al., 2018) to get the m<sup>6</sup>A-gain variants from the m<sup>6</sup>A IP data. Lastly, we used  
13 DOSE(v3.2.0)(Yu et al., 2015) to analyze the correlation between m<sup>6</sup>A-related  
14 SNPs and diseases. Correlation analysis of SNP and m<sup>6</sup>Am was similar to that  
15 of m<sup>6</sup>A. It is noteworthy that we also defined and calculated the SNP frequency  
16 of position background (regions surrounding TSS) and genome background to  
17 ensure the m<sup>6</sup>Am enrichment is not false-positive.

18

### 19 **Prediction of m<sup>6</sup>Am-binding proteins**

20 We adopted a computational pipeline (Huang et al., 2018) to screen potential  
21 m<sup>6</sup>Am binding proteins using the m<sup>6</sup>Am modification signal identified in our

1 study and the published crosslinking and immunoprecipitation followed by  
2 high-throughput sequencing (CLIP-seq) of 171 RNA binding proteins (RBPs)  
3 from POSTAR, which provides annotations and functions of RNA binding  
4 proteins (RBPs) as well as RBP binding sites (Zhu et al., 2019). The CLIP-seq  
5 peaks of each RBP were intersected with m<sup>6</sup>Am peaks identified in our study to  
6 calculate the ratio between the number of peaks overlapping with m<sup>6</sup>Am and  
7 the total number of RBP binding sites (m<sup>6</sup>Am-containing peak numbers/total  
8 RBP binding sites numbers). Besides, we also use the total m<sup>6</sup>Am peak  
9 numbers of the tissues to avoid false-positive. Moreover, the regions flanking  
10 the transcription start sites (from the transcript start site extend backward  
11 400bp, referred to non-m<sup>6</sup>Am region) of non-m<sup>6</sup>Am harboring transcripts were  
12 selected and were intersected with the RBPs binding sites as negative control.  
13 We defined and calculated the RBP enrichment score (ES) as follows:

$$14 \quad ES = \log_2 \left( \frac{\frac{\text{numbers of m}^6\text{Am peaks overlapped with RBP binding sites}}{\text{m}^6\text{Am peak numbers} \times \text{RBP binding site numbers}}}{\frac{\text{numbers of non-m}^6\text{Am region overlapped with RBP binding sites}}{\text{non-m}^6\text{Am region numbers} \times \text{RBP binding site numbers}}} \right)$$

15

16

## 17 **QUANTIFICATION AND STATISTICAL ANALYSIS**

18 p-values were calculated using unpaired two-sided student's t test. \*\*\*p <

19 0.001; \*\*p < 0.01; \*p < 0.05; n.s., non-significant. As to SNPs analysis,

20 p-values were calculated using unpaired two-sided Mann-Whitney U-test. \*p <

1 0.05, \*\*p < 0.01. N.S. stands for not significant. Error bars represent mean ±  
2 SD.

3

#### 4 **DATA AND SOFTWARE AVAILABILITY**

5 The raw sequence data reported in this paper have been deposited in the  
6 Genome Sequence Archive in BIG Data Center, Beijing Institute of Genomics  
7 (BIG), Chinese Academy of Sciences. A summary of the m<sup>6</sup>A and m<sup>6</sup>Am signal  
8 identified in human and mouse tissues and cell lines can be found in Table S1.  
9 All other data supporting the findings of this study are available from the  
10 corresponding author on reasonable request.

11

12

13

14

15

16

17

18

## 1 REFERENCES

- 2 Akichika, S., Hirano, S., Shichino, Y., Suzuki, T., Nishimasu, H., Ishitani, R., Sugita, A.,  
3 Hirose, Y., Iwasaki, S., Nureki, O., *et al.* (2018). Cap-specific terminal N (6)-methylation of  
4 RNA by an RNA polymerase II-associated methyltransferase. *Science*.
- 5 Bailey, T.L., Boden, M., Buske, F.A., Frith, M., Grant, C.E., Clementi, L., Ren, J., Li, W.W.,  
6 and Noble, W.S. (2009). MEME SUITE: tools for motif discovery and searching. *Nucleic*  
7 *Acids Res* 37, W202-208.
- 8 Belanger, F., Stepinski, J., Darzynkiewicz, E., and Pelletier, J. (2010). Characterization of  
9 hMTr1, a human Cap1 2'-O-ribose methyltransferase. *J Biol Chem* 285, 33037-33044.
- 10 Bohnsack, M.T., and Sloan, K.E. (2018). Modifications in small nuclear RNAs and their  
11 roles in spliceosome assembly and function. *Biol Chem* 399, 1265-1276.
- 12 Bokar, J.A., Rathshambaugh, M.E., Ludwiczak, R., Narayan, P., and Rottman, F. (1994).  
13 Characterization and Partial-Purification of Messenger-Rna N-6-Adenosine  
14 Methyltransferase from Hela-Cell Nuclei - Internal Messenger-Rna Methylation Requires a  
15 Multisubunit Complex. *J Biol Chem* 269, 17697-17704.
- 16 Bokar, J.A., Shambaugh, M.E., Polayes, D., Matera, A.G., and Rottman, F.M. (1997).  
17 Purification and cDNA cloning of the AdoMet-binding subunit of the human mRNA  
18 (N6-adenosine)-methyltransferase. *RNA* 3, 1233-1247.
- 19 Carninci, P., Sandelin, A., Lenhard, B., Katayama, S., Shimokawa, K., Ponjavic, J.,  
20 Semple, C.A., Taylor, M.S., Engstrom, P.G., Frith, M.C., *et al.* (2006). Genome-wide  
21 analysis of mammalian promoter architecture and evolution. *Nat Genet* 38, 626-635.
- 22 Dominissini, D., Moshitch-Moshkovitz, S., Schwartz, S., Salmon-Divon, M., Ungar, L.,  
23 Osenberg, S., Cesarkas, K., Jacob-Hirsch, J., Amariglio, N., Kupiec, M., *et al.* (2012).  
24 Topology of the human and mouse m6A RNA methylomes revealed by m6A-seq. *Nature*  
25 485, 201-206.
- 26 Du, K., Zhang, L., Lee, T., and Sun, T. (2018). m(6)A RNA Methylation Controls Neural  
27 Development and Is Involved in Human Diseases. *Mol Neurobiol*.
- 28 Edupuganti, R.R., Geiger, S., Lindeboom, R.G.H., Shi, H., Hsu, P.J., Lu, Z., Wang, S.Y.,  
29 Baltissen, M.P.A., Jansen, P., Rossa, M., *et al.* (2017). N(6)-methyladenosine (m(6)A)  
30 recruits and repels proteins to regulate mRNA homeostasis. *Nat Struct Mol Biol* 24,  
31 870-878.
- 32 Eisenberg, E., and Levanon, E.Y. (2013). Human housekeeping genes, revisited. *Trends*  
33 *Genet* 29, 569-574.
- 34 Feng, J.X., Liu, T., Qin, B., Zhang, Y., and Liu, X.S. (2012). Identifying ChIP-seq  
35 enrichment using MACS. *Nature Protocols* 7, 1728-1740.
- 36 Frith, M.C., Valen, E., Krogh, A., Hayashizaki, Y., Carninci, P., and Sandelin, A. (2008). A  
37 code for transcription initiation in mammalian genomes. *Genome Res* 18, 1-12.
- 38 Fu, Y., Dominissini, D., Rechavi, G., and He, C. (2014). Gene expression regulation  
39 mediated through reversible m(6)A RNA methylation. *Nat Rev Genet* 15, 293-306.
- 40 Heinz, S., Benner, C., Spann, N., Bertolino, E., Lin, Y.C., Laslo, P., Cheng, J.X., Murre, C.,  
41 Singh, H., and Glass, C.K. (2010). Simple combinations of lineage-determining

- 1 transcription factors prime cis-regulatory elements required for macrophage and B cell  
2 identities. *Mol Cell* 38, 576-589.
- 3 Hong, K. (2018). Emerging function of N6-methyladenosine in cancer. *Oncol Lett* 16,  
4 5519-5524.
- 5 Hsu, P.J., Zhu, Y.F., Ma, H.H., Guo, Y.H., Shi, X.D., Liu, Y.Y., Qi, M.J., Lu, Z.K., Shi, H.L.,  
6 Wang, J.Y., *et al.* (2017). Ythdc2 is an N-6-methyladenosine binding protein that regulates  
7 mammalian spermatogenesis. *Cell Res* 27, 1115-1127.
- 8 Huang, D.W., Sherman, B.T., and Lempicki, R.A. (2009). Systematic and integrative  
9 analysis of large gene lists using DAVID bioinformatics resources. *Nature Protocols* 4,  
10 44-57.
- 11 Huang, H., Weng, H., Sun, W., Qin, X., Shi, H., Wu, H., Zhao, B.S., Mesquita, A., Liu, C.,  
12 Yuan, C.L., *et al.* (2018). Recognition of RNA N(6)-methyladenosine by IGF2BP proteins  
13 enhances mRNA stability and translation. *Nat Cell Biol* 20, 285-295.
- 14 Jain, A., and Tuteja, G. (2018). TissueEnrich: Tissue-specific gene enrichment analysis.  
15 *Bioinformatics*.
- 16 Jia, G., Fu, Y., Zhao, X., Dai, Q., Zheng, G., Yang, Y., Yi, C., Lindahl, T., Pan, T., Yang,  
17 Y.G., *et al.* (2011). N6-methyladenosine in nuclear RNA is a major substrate of the  
18 obesity-associated FTO. *Nat Chem Biol* 7, 885-887.
- 19 Jiang, S., Xie, Y., He, Z., Zhang, Y., Zhao, Y., Chen, L., Zheng, Y., Miao, Y., Zuo, Z., and  
20 Ren, J. (2018). m6ASNP: a tool for annotating genetic variants by m6A function.  
21 *Gigascience* 7.
- 22 Kim, D., Langmead, B., and Salzberg, S.L. (2015). HISAT: a fast spliced aligner with low  
23 memory requirements. *Nat Methods* 12, 357-360.
- 24 Kim, D., Perte, G., Trapnell, C., Pimentel, H., Kelley, R., and Salzberg, S.L. (2013).  
25 TopHat2: accurate alignment of transcriptomes in the presence of insertions, deletions  
26 and gene fusions. *Genome Biol* 14, R36.
- 27 Kim, M.S., Pinto, S.M., Getnet, D., Nirujogi, R.S., Manda, S.S., Chaerkady, R.,  
28 Madugundu, A.K., Kelkar, D.S., Isserlin, R., Jain, S., *et al.* (2014). A draft map of the  
29 human proteome. *Nature* 509, 575-581.
- 30 Kozomara, A., and Griffiths-Jones, S. (2014). miRBase: annotating high confidence  
31 microRNAs using deep sequencing data. *Nucleic Acids Research* 42, D68-D73.
- 32 Langfelder, P., and Horvath, S. (2008). WGCNA: an R package for weighted correlation  
33 network analysis. *BMC Bioinformatics* 9, 559.
- 34 Langmead, B., Trapnell, C., Pop, M., and Salzberg, S.L. (2009). Ultrafast and  
35 memory-efficient alignment of short DNA sequences to the human genome. *Genome Biol*  
36 10, R25.
- 37 Li, H. (2011). A statistical framework for SNP calling, mutation discovery, association  
38 mapping and population genetical parameter estimation from sequencing data.  
39 *Bioinformatics* 27, 2987-2993.
- 40 Li, X., Xiong, X., and Yi, C. (2016). Epitranscriptome sequencing technologies: decoding  
41 RNA modifications. *Nat Methods* 14, 23-31.
- 42 Liu, J., Yue, Y., Han, D., Wang, X., Fu, Y., Zhang, L., Jia, G., Yu, M., Lu, Z., Deng, X., *et al.*

- 1 (2014). A METTL3-METTL14 complex mediates mammalian nuclear RNA N6-adenosine  
2 methylation. *Nat Chem Biol* 10, 93-95.
- 3 Liu, N., and Pan, T. (2016). N6-methyladenosine-encoded epitranscriptomics. *Nat Struct*  
4 *Mol Biol* 23, 98-102.
- 5 Luo, J., Liu, H., Luan, S., He, C., and Li, Z. (2018). Aberrant Regulation of mRNA m(6)A  
6 Modification in Cancer Development. *Int J Mol Sci* 19.
- 7 Machnicka, M.A., Milanowska, K., Osman Oglou, O., Purta, E., Kurkowska, M., Olchowik,  
8 A., Januszewski, W., Kalinowski, S., Dunin-Horkawicz, S., Rother, K.M., *et al.* (2013).  
9 MODOMICS: a database of RNA modification pathways--2013 update. *Nucleic Acids Res*  
10 41, D262-267.
- 11 Mauer, J., Luo, X., Blanjoie, A., Jiao, X., Grozhik, A.V., Patil, D.P., Linder, B., Pickering,  
12 B.F., Vasseur, J.J., Chen, Q., *et al.* (2017). Reversible methylation of m(6)Am in the 5' cap  
13 controls mRNA stability. *Nature* 541, 371-375.
- 14 Ni, T., Corcoran, D.L., Rach, E.A., Song, S., Spana, E.P., Gao, Y., Ohler, U., and Zhu, J.  
15 (2010). A paired-end sequencing strategy to map the complex landscape of transcription  
16 initiation. *Nat Methods* 7, 521-527.
- 17 Ping, X.L., Sun, B.F., Wang, L., Xiao, W., Yang, X., Wang, W.J., Adhikari, S., Shi, Y., Lv, Y.,  
18 Chen, Y.S., *et al.* (2014). Mammalian WTAP is a regulatory subunit of the RNA  
19 N6-methyladenosine methyltransferase. *Cell Res* 24, 177-189.
- 20 Plessy, C., Bertin, N., Takahashi, H., Simone, R., Salimullah, M., Lassmann, T., Vitezic, M.,  
21 Severin, J., Olivarius, S., Lazarevic, D., *et al.* (2010). Linking promoters to functional  
22 transcripts in small samples with nanoCAGE and CAGEscan. *Nat Methods* 7, 528-534.
- 23 Quinlan, A.R., and Hall, I.M. (2010). BEDTools: a flexible suite of utilities for comparing  
24 genomic features. *Bioinformatics* 26, 841-842.
- 25 Roundtree, I.A., Evans, M.E., Pan, T., and He, C. (2017a). Dynamic RNA Modifications in  
26 Gene Expression Regulation. *Cell* 169, 1187-1200.
- 27 Roundtree, I.A., Luo, G.Z., Zhang, Z., Wang, X., Zhou, T., Cui, Y., Sha, J., Huang, X.,  
28 Guerrero, L., Xie, P., *et al.* (2017b). YTHDC1 mediates nuclear export of  
29 N(6)-methyladenosine methylated mRNAs. *Elife* 6.
- 30 Schultz, M.D., He, Y., Whitaker, J.W., Hariharan, M., Mukamel, E.A., Leung, D., Rajagopal,  
31 N., Nery, J.R., Urich, M.A., Chen, H., *et al.* (2015). Human body epigenome maps reveal  
32 noncanonical DNA methylation variation. *Nature* 523, 212-216.
- 33 Schwartz, S., Mumbach, M.R., Jovanovic, M., Wang, T., Maciag, K., Bushkin, G.G.,  
34 Mertins, P., Ter-Ovanesyan, D., Habib, N., Cacchiarelli, D., *et al.* (2014). Perturbation of  
35 m6A writers reveals two distinct classes of mRNA methylation at internal and 5' sites. *Cell*  
36 *Rep* 8, 284-296.
- 37 Shi, H., Wang, X., Lu, Z., Zhao, B.S., Ma, H., Hsu, P.J., Liu, C., and He, C. (2017).  
38 YTHDF3 facilitates translation and decay of N(6)-methyladenosine-modified RNA. *Cell*  
39 *Res* 27, 315-328.
- 40 Sun, H., Zhang, M., Li, K., Bai, D., and Yi, C. (2018). Cap-specific, terminal  
41 N(6)-methylation by a mammalian m(6)Am methyltransferase. *Cell Res*.
- 42 Tan, M.H., Li, Q., Shanmugam, R., Piskol, R., Kohler, J., Young, A.N., Liu, K.I., Zhang, R.,

- 1 Ramaswami, G., Ariyoshi, K., *et al.* (2017). Dynamic landscape and regulation of RNA  
2 editing in mammals. *Nature* 550, 249-254.
- 3 Thorvaldsdottir, H., Robinson, J.T., and Mesirov, J.P. (2013). Integrative Genomics Viewer  
4 (IGV): high-performance genomics data visualization and exploration. *Brief Bioinform* 14,  
5 178-192.
- 6 Trapnell, C., Williams, B.A., Pertea, G., Mortazavi, A., Kwan, G., van Baren, M.J.,  
7 Salzberg, S.L., Wold, B.J., and Pachter, L. (2010). Transcript assembly and quantification  
8 by RNA-Seq reveals unannotated transcripts and isoform switching during cell  
9 differentiation. *Nat Biotechnol* 28, 511-515.
- 10 Uhlen, M., Fagerberg, L., Hallstrom, B.M., Lindskog, C., Oksvold, P., Mardinoglu, A.,  
11 Sivertsson, A., Kampf, C., Sjostedt, E., Asplund, A., *et al.* (2015). Proteomics.  
12 Tissue-based map of the human proteome. *Science* 347, 1260419.
- 13 Volders, P.J., Anckaert, J., Verheggen, K., Nuytens, J., Martens, L., Mestdagh, P., and  
14 Vandesompele, J. (2018). LNCipedia 5: towards a reference set of human long  
15 non-coding RNAs. *Nucleic Acids Res.*
- 16 Wang, K., Li, M., and Hakonarson, H. (2010). ANNOVAR: functional annotation of genetic  
17 variants from high-throughput sequencing data. *Nucleic Acids Res* 38, e164.
- 18 Wang, X., Lu, Z., Gomez, A., Hon, G.C., Yue, Y., Han, D., Fu, Y., Parisien, M., Dai, Q., Jia,  
19 G., *et al.* (2014a). N6-methyladenosine-dependent regulation of messenger RNA stability.  
20 *Nature* 505, 117-120.
- 21 Wang, X., Zhao, B.S., Roundtree, I.A., Lu, Z., Han, D., Ma, H., Weng, X., Chen, K., Shi, H.,  
22 and He, C. (2015). N(6)-methyladenosine Modulates Messenger RNA Translation  
23 Efficiency. *Cell* 161, 1388-1399.
- 24 Wang, Y., Li, Y., Toth, J.I., Petroski, M.D., Zhang, Z., and Zhao, J.C. (2014b).  
25 N6-methyladenosine modification destabilizes developmental regulators in embryonic  
26 stem cells. *Nat Cell Biol* 16, 191-198.
- 27 Wei, C., Gershowitz, A., and Moss, B. (1975). N6, O2'-dimethyladenosine a novel  
28 methylated ribonucleoside next to the 5' terminal of animal cell and virus mRNAs. *Nature*  
29 257, 251-253.
- 30 Wei, J., Liu, F., Lu, Z., Fei, Q., Ai, Y., He, P.C., Shi, H., Cui, X., Su, R., Klungland, A., *et al.*  
31 (2018). Differential m(6)A, m(6)Am, and m(1)A Demethylation Mediated by FTO in the Cell  
32 Nucleus and Cytoplasm. *Mol Cell* 71, 973-985 e975.
- 33 Werner, M., Purta, E., Kaminska, K.H., Cymerman, I.A., Campbell, D.A., Mittra, B.,  
34 Zamudio, J.R., Sturm, N.R., Jaworski, J., and Bujnicki, J.M. (2011). 2'-O-ribose  
35 methylation of cap2 in human: function and evolution in a horizontally mobile family.  
36 *Nucleic Acids Res* 39, 4756-4768.
- 37 Xiao, S., Cao, S., Huang, Q., Xia, L., Deng, M., Yang, M., Jia, G., Liu, X., Shi, J., Wang, W.,  
38 *et al.* (2019). The RNA N(6)-methyladenosine modification landscape of human fetal  
39 tissues. *Nat Cell Biol.*
- 40 Yang, Y., Hsu, P.J., Chen, Y.S., and Yang, Y.G. (2018). Dynamic transcriptomic m(6)A  
41 decoration: writers, erasers, readers and functions in RNA metabolism. *Cell Res* 28,  
42 616-624.

- 1 Yu, G.C., Wang, L.G., Yan, G.R., and He, Q.Y. (2015). DOSE: an R/Bioconductor package  
2 for disease ontology semantic and enrichment analysis. *Bioinformatics* 31, 608-609.
- 3 Zeng, Y., Wang, S., Gao, S., Soares, F., Ahmed, M., Guo, H., Wang, M., Hua, J.T., Guan,  
4 J., Moran, M.F., *et al.* (2018). Refined RIP-seq protocol for epitranscriptome analysis with  
5 low input materials. *PLoS Biol* 16, e2006092.
- 6 Zhao, B.S., Roundtree, I.A., and He, C. (2017). Post-transcriptional gene regulation by  
7 mRNA modifications. *Nat Rev Mol Cell Biol* 18, 31-42.
- 8 Zheng, G., Dahl, J.A., Niu, Y., Fedorcsak, P., Huang, C.M., Li, C.J., Vagbo, C.B., Shi, Y.,  
9 Wang, W.L., Song, S.H., *et al.* (2013). ALKBH5 is a mammalian RNA demethylase that  
10 impacts RNA metabolism and mouse fertility. *Mol Cell* 49, 18-29.
- 11 Zhou, K.I., and Pan, T. (2018). An additional class of m(6)A readers. *Nat Cell Biol* 20,  
12 230-232.
- 13 Zhu, Y., Xu, G., Yang, Y.T., Xu, Z., Chen, X., Shi, B., Xie, D., Lu, Z.J., and Wang, P. (2019).  
14 POSTAR2: deciphering the post-transcriptional regulatory logics. *Nucleic Acids Res* 47,  
15 D203-D211.
- 16 Ziller, M.J., Gu, H., Muller, F., Donaghey, J., Tsai, L.T., Kohlbacher, O., De Jager, P.L.,  
17 Rosen, E.D., Bennett, D.A., Bernstein, B.E., *et al.* (2013). Charting a dynamic DNA  
18 methylation landscape of the human genome. *Nature* 500, 477-481.
- 19
